# Supplementary material for: A Comparison of Co-methylation Relationships Between Rheumatoid Arthritis and Parkinson's Disease
Source: Front Neurosci. 2019 Jan 10;12:1001. doi: 10.3389/fnins.2018.01001 (PMC6335329; doi:10.3389/fnins.2018.01001)
Supplement: Supplementary File S1 — 1,893 gene pairs crossing no less than three intervals with large changes of the co-methylation relationship from RA controls to cases. [file Table_1.XLSX]

## Sheet: Sheet1
gene1	gene2	RA_control_corr	RA_case_corr
C12orf77	TSHZ3	-0.779	-0.104
MIR922	TSHZ3	-0.79	-0.086
AADAT	TAS2R16	-0.512	0.022
APOC4	CDK20	-0.533	0.047
ARID5B	LCA5	-0.516	0.113
BCL7A	LCA5	-0.547	0.002
BLK	LCA5	-0.512	0.076
BCL7A	TSHZ3	-0.53	0.106
BLK	TSHZ3	-0.573	0.072
BLNK	TSHZ3	-0.544	0.073
C12orf74	C17orf102	-0.58	0.02
C12orf74	ETV1	-0.544	0.007
C12orf77	PVR	-0.545	0.042
C12orf74	TSHZ3	-0.552	0.137
C17orf102	C8orf46	-0.534	0.004
C17orf102	CLEC1A	-0.528	0.012
C17orf102	CNBD1	-0.505	0.03
C17orf102	EPN1	-0.517	0.034
C17orf102	MIR624	-0.54	0.018
C17orf102	MIR634	-0.519	0.04
C17orf102	SNORD113-4	-0.518	0.005
C1orf64	CDK20	-0.531	0.023
C1orf64	ETV1	-0.556	0.013
C21orf131	TSHZ3	-0.503	0.07
C2orf66	PRDM14	-0.522	0.002
C4orf26	TSHZ3	-0.512	0.06
C6orf222	TSHZ3	-0.538	0.083
CCDC89	TSHZ3	-0.518	0.165
CCL14-CCL15	TSHZ3	-0.525	0.077
CCL14	TSHZ3	-0.52	0.066
CD19	TSHZ3	-0.596	0.041
CD53	CDK20	-0.523	0.019
CD53	CRYBA2	-0.562	0.032
CD53	CWH43	-0.509	0.014
CD53	EN2	-0.505	0.004
CD53	FLJ45983	-0.559	0.034
CD53	FOXC2	-0.54	0.041
CD53	GDF6	-0.508	0.002
CD53	HOXC11	-0.523	0.026
CD53	LCA5	-0.552	0.08
CD53	NKX2-2	-0.521	0.02
CD86	SP5	-0.514	0.006
CD53	TAC1	-0.509	0.06
CD53	TSHZ3	-0.582	0.204
CD84	TSHZ3	-0.532	0.012
CD53	ZNF334	-0.528	0.078
CDK20	LILRB4	-0.502	0.094
CDK20	MIR922	-0.663	0.016
CDK20	MYL4	-0.526	0.053
CDK20	TNFRSF13C	-0.586	0.032
CLEC1A	OTOP2	-0.521	0.031
EPN1	GATA3	-0.507	0.065
EPN1	LCA5	-0.53	0.149
EPN1	TSHZ3	-0.629	0.15
ETV1	MIR624	-0.513	0.105
FAM12A	TSHZ3	-0.508	0.023
FBXO10	TSHZ3	-0.592	0.104
FLJ45983	GRB2	-0.542	0.11
FLJ45983	OAS1	-0.531	0.051
FRMPD2L2	TMEM196	-0.506	0
GATA3	TNFRSF13C	-0.545	0.036
GATA3	ZC3H7A	-0.56	0.033
GLYAT	MAL	-0.501	0.002
ITLN2	TSHZ3	-0.528	0.153
KALRN	TMEM196	-0.512	0.033
KRTAP1-5	TMEM196	-0.506	0.007
LCA5	LILRB4	-0.544	0.017
LCA5	LOC728743	-0.535	0.076
LCA5	MPEG1	-0.503	0.194
LCA5	NFKBIE	-0.531	0.032
LCA5	TNFRSF13C	-0.508	0.045
LCA5	TOM1L2	-0.512	0.06
LILRB4	TSHZ3	-0.627	0.008
LOC100128675	TMEM196	-0.528	0.008
LOC283332	TSHZ3	-0.502	0
LOC91450	STEAP2	-0.503	0.003
LOC728743	TSHZ3	-0.539	0.18
MIR549	OTOP2	-0.521	0.015
MIR549	SALL1	-0.512	0.027
MIR922	PVR	-0.533	0.148
MIR922	SLC6A2	-0.507	0.096
MIR922	STEAP2	-0.525	0.031
MPEG1	TSHZ3	-0.536	0.246
MPEG1	ZNF334	-0.528	0.001
MTERFD2	TSHZ3	-0.587	0.204
MTERFD2	ZNF334	-0.533	0.005
NFKBIE	TSHZ3	-0.541	0.244
NRM	TSHZ3	-0.596	0.138
OAS1	SP5	-0.502	0.119
OC90	TMEM196	-0.538	0.038
OR6N1	TSHZ3	-0.52	0.005
OTOP2	TMCO5A	-0.501	0.035
P11	TSHZ3	-0.531	0.223
PLEKHF2	SP5	-0.503	0.014
PLEKHF2	TSHZ3	-0.53	0.205
PNPLA7	TMEM196	-0.503	0.007
SFT2D3	TSHZ3	-0.527	0.119
SNORD4B	TSHZ3	-0.509	0.108
SNX8	TSHZ3	-0.539	0.04
SPATA8	TMEM196	-0.527	0.004
ST6GAL1	TSHZ3	-0.572	0.248
TIFAB	TMEM196	-0.509	0.021
TMEM196	TNP1	-0.514	0.007
TMEM196	VTCN1	-0.515	0.001
TMEM196	WFDC6	-0.558	0.001
TMEM196	ZP4	-0.523	0.002
TNFRSF13C	TSHZ3	-0.666	0.097
TNFRSF1B	TSHZ3	-0.515	0.129
TRAF5	TSHZ3	-0.525	0.142
TSHZ3	ZC3H7A	-0.56	0.246
ARHGAP17	TSHZ3	-0.561	0.382
DDX54	TSHZ3	-0.527	0.39
GATA3	GRB2	-0.544	0.279
GRB2	TSHZ3	-0.616	0.441
PIGC	TSHZ3	-0.513	0.281
AADAT	DDX54	-0.32	0.285
ABCC3	FGD2	-0.28	0.267
AADAT	GRB2	-0.26	0.369
ABCC3	MIR339	-0.345	0.258
AADAT	MSH3	-0.257	0.295
AADAT	OAS1	-0.268	0.317
ABCC3	TNFRSF13C	-0.276	0.304
ACADL	ALKBH5	-0.305	0.289
ACADL	DEK	-0.258	0.339
ACADL	GRB2	-0.275	0.395
ACTA1	GRB2	-0.26	0.274
ACADL	MCM3	-0.279	0.253
ACSS3	MIR155HG	-0.27	0.258
ACADL	OAS1	-0.262	0.306
ACADL	UCKL1AS	-0.263	0.282
ACADL	VPS33A	-0.289	0.25
ADAMTS5	AP1S3	-0.264	0.304
ADAMTS5	BCAS4	-0.279	0.275
ADAMTS5	DDX54	-0.33	0.288
ADAMTS5	GRB2	-0.282	0.438
ADAM7	MTHFD2	-0.272	0.263
ADAMTS5	MTSS1	-0.256	0.27
ADAMTS5	ST6GAL1	-0.295	0.27
ADAMTS5	TIMD4	-0.262	0.27
ADAM19	TSHZ3	-0.303	0.381
ADO	LCA5	-0.266	0.267
ADO	MLL3	-0.262	0.258
ADRA2A	SPAM1	-0.253	0.254
ADD2	TSHZ3	-0.297	0.273
AKR1D1	CDK20	-0.262	0.273
AKR1CL1	LCA5	-0.262	0.261
AGPAT6	TSHZ3	-0.295	0.345
AKR1D1	ZFP30	-0.258	0.27
ALKBH5	AVPR1A	-0.274	0.254
ALKBH5	CDK20	-0.251	0.267
ALDH1A2	CNBD1	-0.252	0.316
ALKBH5	EPB41L3	-0.301	0.303
ALKBH5	FSTL5	-0.269	0.312
ALKBH1	LCA5	-0.272	0.26
ALKBH5	LCA5	-0.322	0.347
ALKBH5	PCDH11X	-0.26	0.361
ALKBH5	TSHZ3	-0.263	0.358
AMFR	TSHZ3	-0.309	0.299
AMZ2	C4orf51	-0.254	0.271
AMZ2	FUT8	-0.254	0.252
AMZ2	KIAA0564	-0.272	0.251
ANGPT4	LCA5	-0.262	0.384
ANK2	MAL	-0.298	0.257
AMZ2	MAP2K4	-0.272	0.259
AMZ2	NAT1	-0.265	0.282
AMZ2	SNORA19	-0.296	0.313
AMZ2	UBXN2B	-0.252	0.25
ANO6	C17orf102	-0.277	0.261
AP1S3	C17orf102	-0.323	0.273
AP1S3	ETV1	-0.3	0.279
ANO4	MAL	-0.255	0.25
ANKRD55	MTHFD2	-0.262	0.284
AP1S3	PCDH11X	-0.262	0.271
AP1S3	TSHZ3	-0.349	0.362
APOBEC4	TSHZ3	-0.283	0.293
ARHGAP17	CDK20	-0.447	0.272
ARHGAP17	CRY1	-0.254	0.382
ARHGAP17	GATA3	-0.477	0.28
ARID5B	GATA3	-0.364	0.295
ARHGAP17	KCNF1	-0.259	0.285
ARID5B	MORN4	-0.251	0.286
ARHGAP17	PVR	-0.273	0.492
ARID5B	PVR	-0.258	0.41
ARL16	ROBO2	-0.252	0.253
ARHGAP17	SATB2	-0.257	0.309
ARID5B	SLC6A2	-0.313	0.256
ARHGAP17	STEAP2	-0.261	0.369
ARID5B	STEAP2	-0.313	0.305
ASB5	BOD1L	-0.263	0.259
ASB4	MTHFD2	-0.27	0.257
ASB5	MTHFD2	-0.291	0.283
ASCC1	TSHZ3	-0.291	0.253
ATP13A1	LCA5	-0.309	0.25
ATP1A1	TSHZ3	-0.304	0.415
ATXN1	TSHZ3	-0.336	0.269
BAAT	BOD1L	-0.28	0.25
B9D1	C17orf102	-0.304	0.265
BACH2	C17orf102	-0.273	0.307
BCAS4	C17orf102	-0.309	0.349
BCAS4	CCDC37	-0.267	0.3
BCAS4	CYP24A1	-0.253	0.267
BCAS4	ETV1	-0.267	0.389
BCAS4	FGF5	-0.255	0.287
BCAS4	FLRT2	-0.262	0.319
BCAS4	FSTL5	-0.267	0.283
BCAS4	GATA3	-0.305	0.371
BCAS4	KCNJ3	-0.255	0.272
BARHL2	RAB30	-0.257	0.266
BCAS4	SALL1	-0.291	0.256
BCAS4	SLC7A10	-0.265	0.296
BACH2	TSHZ3	-0.265	0.406
BCAR3	TSHZ3	-0.29	0.268
BCAS4	TSHZ3	-0.459	0.346
BCAS4	ZDBF2	-0.258	0.272
BLK	CNTN5	-0.264	0.339
BDH2	LCA5	-0.282	0.293
BLK	PVR	-0.26	0.384
BLK	SLC6A2	-0.319	0.266
BOD1L	C1orf110	-0.305	0.277
BMPR1B	DDX54	-0.252	0.278
BOD1L	MIR1307	-0.262	0.335
BNIP1	SNORA19	-0.329	0.275
C10orf104	CNTN5	-0.375	0.25
C11orf24	TSHZ3	-0.274	0.412
C11orf24	ZNF334	-0.262	0.305
C12orf74	CDK20	-0.389	0.368
C12orf74	LCA5	-0.29	0.345
C14orf43	LCA5	-0.257	0.254
C17orf102	C5orf13	-0.273	0.256
C17orf102	CLEC17A	-0.352	0.26
C17orf102	DDX54	-0.32	0.355
C17orf102	FMNL3	-0.288	0.439
C17orf102	GAB1	-0.336	0.283
C17orf102	GRB2	-0.455	0.374
C17orf102	H3F3C	-0.273	0.324
C17orf102	HVCN1	-0.286	0.418
C17orf102	IGF1	-0.325	0.292
C17orf102	IRF8	-0.281	0.268
C17orf102	JAK1	-0.329	0.308
C17orf102	KIAA0922	-0.273	0.315
C17orf102	LFNG	-0.285	0.326
C17orf102	LOC100216001	-0.252	0.25
C17orf102	LRRC16A	-0.293	0.357
C17orf102	MAP3K13	-0.257	0.25
C17orf102	MSH3	-0.302	0.333
C17orf102	OAS1	-0.416	0.269
C17orf102	PPM1H	-0.359	0.262
C17orf102	PRSS35	-0.255	0.29
C17orf102	SCAMP2	-0.254	0.304
C17orf102	ST6GAL1	-0.398	0.257
C17orf102	TBL1XR1	-0.32	0.27
C17orf102	TMTC2	-0.344	0.321
C17orf102	TPD52	-0.266	0.268
C18orf20	ZFP30	-0.26	0.291
C1orf110	PPM1J	-0.278	0.275
C1orf105	TSHZ3	-0.354	0.253
C1orf185	TYMS	-0.253	0.258
C1orf64	CNTN5	-0.288	0.265
C1orf64	PVR	-0.36	0.266
C20orf195	TSHZ3	-0.279	0.294
C22orf39	CNTN5	-0.292	0.251
C21orf67	ETV1	-0.291	0.299
C21orf67	GATA3	-0.261	0.284
C21orf67	LCA5	-0.448	0.306
C21orf67	PPP1R1A	-0.285	0.261
C21orf88	RFC2	-0.277	0.251
C21orf131	SLC6A2	-0.284	0.255
C21orf67	ZDBF2	-0.272	0.26
C2orf66	CDK20	-0.296	0.296
C3orf54	FLJ41562	-0.256	0.266
C2orf77	SNORA19	-0.26	0.278
C4orf26	CNTN5	-0.268	0.286
C6orf136	ETV1	-0.252	0.32
C6orf136	GATA3	-0.28	0.297
C5orf13	OTOP2	-0.264	0.279
C5orf13	SALL1	-0.251	0.262
C6orf129	TSHZ3	-0.257	0.281
C6orf136	TSHZ3	-0.34	0.36
C4orf6	ZFP30	-0.257	0.27
C7orf58	MAL	-0.268	0.251
C7orf25	MIR1307	-0.262	0.253
C6orf222	MORN4	-0.259	0.258
C6orf222	SLC6A2	-0.3	0.301
C6orf222	STEAP2	-0.263	0.285
C7orf58	TSHZ3	-0.292	0.277
C8orf46	CDK20	-0.282	0.376
C9orf130	CDK20	-0.256	0.297
C8orf46	LCA5	-0.297	0.281
C9orf130	LCA5	-0.318	0.322
C9orf70	MAL	-0.267	0.263
C8orf46	PMP22	-0.257	0.258
C8orf46	SURF4	-0.301	0.257
C9orf130	TSHZ3	-0.308	0.456
C9orf130	ZNF334	-0.255	0.307
CACNG8	DDX54	-0.257	0.25
CALY	CD53	-0.283	0.267
CARD18	CNTN5	-0.278	0.252
CALY	GRB2	-0.26	0.443
CAPS2	LCA5	-0.252	0.407
CAPS2	TSHZ3	-0.275	0.289
CARS2	TSHZ3	-0.252	0.346
CBLN2	PI15	-0.252	0.253
CCDC50	CDK20	-0.254	0.389
CCDC91	MTHFD2	-0.255	0.325
CCDC50	TSHZ3	-0.364	0.272
CD19	KCNF1	-0.283	0.31
CCL2	TSHZ3	-0.251	0.298
CD96	CDK20	-0.267	0.264
CD53	CNTN5	-0.336	0.276
CD53	GATA3	-0.429	0.281
CD79B	GATA3	-0.302	0.29
CD86	GATA3	-0.398	0.266
CD86	GHR	-0.265	0.262
CD300LD	PTPRM	-0.252	0.271
CD86	PVR	-0.267	0.315
CD53	SATB2	-0.357	0.268
CD86	STEAP2	-0.269	0.336
CD72	TSHZ3	-0.273	0.322
CD79A	TSHZ3	-0.268	0.38
CD79B	TSHZ3	-0.418	0.299
CD82	TSHZ3	-0.375	0.382
CD86	TSHZ3	-0.497	0.263
CD74	ZNF334	-0.251	0.27
CDK20	CEACAM19	-0.315	0.27
CDK20	CLEC17A	-0.257	0.442
CDK20	CLEC1A	-0.317	0.326
CDK20	CLRN1	-0.268	0.273
CDK20	CNBD1	-0.277	0.263
CDK20	DDX54	-0.432	0.368
CDH7	DEK	-0.293	0.253
CDK20	DEFB129	-0.275	0.265
CDK20	EMP1	-0.259	0.393
CDK20	EZR	-0.254	0.351
CDK20	FAM12A	-0.376	0.283
CDK20	FCRL3	-0.298	0.299
CDK20	GKN1	-0.294	0.292
CDK20	GRB2	-0.484	0.481
CDK20	HNRNPA3P1	-0.306	0.344
CDK20	IRF8	-0.325	0.279
CDK20	KRT2	-0.283	0.326
CDK20	KRTAP4-5	-0.265	0.293
CDK20	KRTAP7-1	-0.262	0.25
CDK20	MED26	-0.271	0.272
CDK20	MIA	-0.369	0.272
CDK20	MIR549	-0.251	0.37
CDK20	MIR634	-0.334	0.356
CDK20	MTSS1	-0.348	0.258
CDK20	NPY6R	-0.259	0.36
CDK20	OAS1	-0.314	0.456
CDK20	OLAH	-0.301	0.285
CDK20	OR13C8	-0.251	0.308
CDK20	OR2L8	-0.27	0.341
CDK20	OR51B5	-0.306	0.352
CDK20	OR51M1	-0.262	0.316
CDK20	OR52B2	-0.268	0.278
CDK20	OR6K3	-0.271	0.275
CDK20	OR6Y1	-0.27	0.257
CDK20	PEA15	-0.3	0.275
CDK20	PIGC	-0.347	0.299
CDK20	PLA2G10	-0.301	0.321
CDK20	PLA2G4A	-0.273	0.294
CDK20	PLEKHF2	-0.342	0.458
CDK20	PPBP	-0.306	0.279
CDH7	RAB30	-0.28	0.257
CDK20	RAB11FIP5	-0.265	0.342
CDK20	RGS13	-0.345	0.374
CDK20	RXFP1	-0.266	0.293
CDK20	SCGB3A2	-0.275	0.329
CDK20	SLC15A4	-0.307	0.288
CDK20	SLC17A1	-0.255	0.314
CDK20	SNORA12	-0.279	0.324
CDK20	SPATS2L	-0.269	0.328
CDK20	ST6GAL1	-0.43	0.322
CDK20	STRBP	-0.26	0.441
CDK20	STS	-0.272	0.286
CDK20	TAL2	-0.261	0.383
CDK20	TAS2R38	-0.29	0.297
CDK20	TAS2R9	-0.266	0.269
CDK20	TM4SF4	-0.273	0.331
CDK20	TYRP1	-0.256	0.283
CDK20	ZC3H7A	-0.44	0.329
CENPM	LCA5	-0.431	0.278
CEACAM19	PTPRM	-0.273	0.269
CENPM	PTPRM	-0.257	0.258
CEACAM19	QRFPR	-0.257	0.277
CENPM	STEAP2	-0.281	0.357
CENPM	TSHZ3	-0.411	0.265
CHDH	TSHZ3	-0.346	0.257
CHN2	TSHZ3	-0.263	0.312
CISD3	LCA5	-0.27	0.285
CIDEA	OAS1	-0.293	0.297
CIAPIN1	PCLO	-0.253	0.27
CHPT1	SNORA19	-0.252	0.306
CLCA4	ZNF32	-0.276	0.285
CHPT1	ZNF532	-0.256	0.251
CLEC17A	ETV1	-0.318	0.258
CLEC1A	LCA5	-0.34	0.261
CLN6	LCA5	-0.256	0.454
CLEC1A	LPPR4	-0.251	0.298
CLEC1A	PPP1R1A	-0.253	0.284
CLEC1A	PTPRM	-0.268	0.264
CLEC17A	TSHZ3	-0.432	0.293
CLEC7A	TSHZ3	-0.347	0.273
CLEC1A	ZFP30	-0.252	0.288
CNTN5	DDX54	-0.292	0.413
CNTN5	EPN1	-0.268	0.418
CNTN5	ITPKB	-0.296	0.31
CNTN5	MTERFD2	-0.251	0.346
CNTN5	PTPN6	-0.296	0.261
CNTN5	RPLP2	-0.258	0.26
CNTN5	SNORD4B	-0.284	0.255
CNTN5	ST6GAL1	-0.265	0.45
CNTN5	TRAF5	-0.282	0.356
CNR1	TSHZ3	-0.306	0.288
COL12A1	GAST	-0.268	0.252
CPA5	FAT4	-0.256	0.251
CPS1	OTOP2	-0.275	0.25
CPA3	PPP1R1A	-0.252	0.274
CSDAP1	DDX54	-0.278	0.263
CRYBA2	DEK	-0.3	0.276
CRY1	EPN1	-0.321	0.259
CRELD1	FLJ41562	-0.271	0.264
CSDAP1	GRB2	-0.255	0.316
CRY1	MIR624	-0.268	0.273
CRY1	MTERFD2	-0.322	0.32
CSDAP1	OAS1	-0.287	0.27
CRYBA2	RAB30	-0.278	0.287
CRY1	ST6GAL1	-0.26	0.403
CSK	TSHZ3	-0.31	0.308
CRY1	ZC3H7A	-0.292	0.364
CTNS	TSHZ3	-0.255	0.36
CTNS	ZNF334	-0.272	0.297
CXCL12	EPN1	-0.271	0.343
CXXC4	FLJ22536	-0.256	0.26
CXCL13	MTHFD2	-0.274	0.265
CXXC4	OR2G6	-0.263	0.251
CWH43	PPTC7	-0.279	0.339
CWH43	PRC1	-0.271	0.283
CWH43	PSD2	-0.27	0.291
CYB5A	RPTN	-0.258	0.28
CWH43	SDCBP2	-0.251	0.284
CWH43	SLC1A2	-0.259	0.354
CYP24A1	DDX54	-0.28	0.287
DACT2	DDX54	-0.272	0.264
CYP24A1	GRB2	-0.317	0.358
CYBASC3	LCA5	-0.374	0.312
CYP24A1	OAS1	-0.261	0.264
CYBASC3	TSHZ3	-0.375	0.387
CYTH1	TSHZ3	-0.279	0.283
CYBASC3	ZNF334	-0.269	0.296
DBC1	GRB2	-0.258	0.281
DBX2	GRB2	-0.283	0.339
DBNL	PCDH11X	-0.281	0.259
DCD	PVR	-0.259	0.296
DBNL	TSHZ3	-0.27	0.405
DBNL	ZNF334	-0.274	0.286
DDX54	EN1	-0.288	0.255
DDX54	EN2	-0.304	0.28
DDX54	EPB41L3	-0.307	0.266
DDX54	ETV1	-0.336	0.423
DDX54	FAM47E	-0.329	0.255
DDX54	FGF5	-0.278	0.287
DDX54	FLJ45983	-0.34	0.278
DDX54	FLRT2	-0.312	0.325
DDX54	FSTL5	-0.306	0.349
DDX54	GALNT13	-0.274	0.285
DDX54	GATA3	-0.274	0.454
DDX54	GDF6	-0.256	0.277
DDX54	HOOK1	-0.257	0.309
DDX54	HOXC13	-0.272	0.254
DDX54	KITLG	-0.273	0.277
DDX54	LCA5	-0.495	0.305
DDX54	LOC400940	-0.296	0.302
DDX54	LRFN5	-0.277	0.347
DDX54	ME1	-0.273	0.257
DDX54	MPV17L	-0.274	0.3
DDX54	NEFL	-0.288	0.269
DDX54	NKX2-2	-0.291	0.269
DDX54	NKX2-6	-0.275	0.271
DDX54	NPY5R	-0.308	0.267
DDX54	PCDH11X	-0.414	0.256
DDX54	PCDH7	-0.257	0.331
DDX54	PDGFC	-0.257	0.296
DDX54	PHACTR3	-0.343	0.277
DDX54	PLA2G7	-0.269	0.342
DDX54	psiTPTE22	-0.305	0.255
DDX54	PVR	-0.302	0.45
DDX54	QRFPR	-0.306	0.258
DDX54	RSPO2	-0.256	0.31
DDX54	SLC6A2	-0.255	0.391
DDX54	SLC7A10	-0.29	0.254
DDX54	SOX21	-0.282	0.256
DDX54	SPEF2	-0.344	0.256
DDX54	STEAP2	-0.366	0.397
DDX54	SYT10	-0.271	0.261
DDX54	TMPRSS2	-0.301	0.341
DDX54	TRPC6	-0.254	0.288
DDX54	ZDBF2	-0.251	0.342
DDX54	ZNF214	-0.264	0.268
DDX54	ZNF285A	-0.331	0.253
DDX54	ZNF354C	-0.302	0.329
DEK	EN1	-0.269	0.261
DEK	EN2	-0.266	0.304
DEK	FLJ45983	-0.307	0.321
DEK	FOXB2	-0.315	0.268
DEK	GSC	-0.258	0.29
DEK	HOXD12	-0.26	0.253
DEK	LCA5	-0.285	0.45
DHFR	LCA5	-0.313	0.338
DEK	LRAT	-0.29	0.254
DEK	NKX2-2	-0.265	0.313
DEK	NKX3-2	-0.252	0.302
DEFB129	SLC6A2	-0.263	0.255
DEK	SP5	-0.331	0.335
DEK	SSTR1	-0.263	0.265
DEK	TAC1	-0.251	0.271
DLG5	LCA5	-0.287	0.326
DLG5	TSHZ3	-0.329	0.295
DNAJB7	MTHFD2	-0.261	0.272
DSEL	EPN1	-0.258	0.284
DSEL	MIA	-0.294	0.256
DPP3	SNORA19	-0.251	0.276
DPY19L2P4	UBE2N	-0.256	0.255
DYDC2	GRB2	-0.307	0.34
DYDC2	OAS1	-0.315	0.283
DYDC2	PIGC	-0.289	0.266
DYDC2	ST6GAL1	-0.253	0.271
DTX1	TSHZ3	-0.456	0.25
EBF2	GRB2	-0.255	0.413
EBF2	PIGC	-0.295	0.278
EBF2	ST6GAL1	-0.293	0.268
ECT2L	TSHZ3	-0.279	0.266
ELK4	SAPS1	-0.252	0.263
EMP1	EPB41L3	-0.276	0.272
ENTPD4	GATA3	-0.317	0.273
EN2	GRB2	-0.353	0.285
EPB41L3	HNRNPA3P1	-0.275	0.268
EMP1	LCA5	-0.349	0.265
EPB41L3	MCM3	-0.262	0.31
EMP1	PCDH17	-0.256	0.257
EPB41L3	PICALM	-0.252	0.304
EPHA7	GRB2	-0.277	0.275
EPHB1	MAL	-0.271	0.253
EPN1	MORN4	-0.264	0.32
EPN1	NCKAP1	-0.304	0.304
EPN1	PVR	-0.343	0.456
EPN1	SLC6A2	-0.285	0.34
EPN1	SPEF2	-0.331	0.272
EPN1	STEAP2	-0.373	0.311
EPHB1	TSHZ3	-0.274	0.269
ETV1	FGL2	-0.272	0.25
ETV1	GRB2	-0.473	0.368
ETV1	HVCN1	-0.261	0.355
ETV1	IGF1	-0.255	0.326
ETV1	ITPKB	-0.258	0.305
ETV1	JAK1	-0.254	0.292
ETV1	LFNG	-0.28	0.317
FABP2	MTHFD2	-0.251	0.25
ETV1	OAS1	-0.378	0.265
ETV1	PLEKHF2	-0.393	0.261
ETV1	SCAMP2	-0.283	0.361
ETV1	ST6GAL1	-0.413	0.262
ETV1	TMTC2	-0.268	0.372
EZR	TSHZ3	-0.35	0.321
FABP5L3	FMNL3	-0.289	0.27
FABP5L3	GRB2	-0.357	0.275
FAM100B	LCA5	-0.286	0.286
FAM128B	LCA5	-0.302	0.297
FABP5L3	MED26	-0.261	0.286
FABP9	MTHFD2	-0.251	0.279
FABP5L3	SLC1A2	-0.305	0.26
FAM12A	SLC6A2	-0.325	0.265
FAM128A	SNORA19	-0.258	0.294
FAM12A	STEAP2	-0.263	0.252
FABP5L3	UBE2N	-0.285	0.323
FAM38B	SLC15A4	-0.264	0.256
FAM41C	TSHZ3	-0.286	0.269
FAP	MTHFD2	-0.275	0.26
FAT4	OSBPL6	-0.272	0.26
FAU	FLJ41562	-0.263	0.315
FAU	KLRB1	-0.255	0.261
FAU	KRTAP4-2	-0.253	0.251
FCAMR	LCA5	-0.26	0.264
FAU	LOC729799	-0.252	0.265
FAU	MIR103-1	-0.254	0.293
FAU	MIR103-1AS	-0.254	0.282
FAU	MIR599	-0.256	0.259
FAU	MIR644	-0.263	0.26
FAU	MIR875	-0.256	0.259
FAU	OR5K1	-0.253	0.274
FAU	PHLPP2	-0.255	0.251
FAU	SNORD111	-0.264	0.273
FAU	SNORD114-16	-0.263	0.259
FGF5	GRB2	-0.304	0.294
FGD6	LCA5	-0.267	0.301
FGB	MTHFD2	-0.257	0.276
FGD6	TSHZ3	-0.266	0.292
FGL2	TSHZ3	-0.286	0.289
FLJ41562	LAT	-0.275	0.253
FLJ22536	OTOP2	-0.296	0.255
FLJ41562	WDTC1	-0.261	0.257
FMNL3	FOXB2	-0.272	0.254
FLJ43663	FUT9	-0.257	0.271
FMNL3	GATA3	-0.327	0.309
FOXB1	GRB2	-0.257	0.252
FLJ45983	LFNG	-0.288	0.274
FMNL3	MIR196B	-0.298	0.26
FMO9P	MTHFD2	-0.258	0.266
FLRT2	PIGC	-0.275	0.258
FLJ45983	RAB30	-0.278	0.349
FOXB2	RAB30	-0.309	0.278
FOXB2	SLC1A2	-0.262	0.263
FMNL3	SP5	-0.318	0.277
FMNL3	SSTR1	-0.253	0.308
FLRT2	ST6GAL1	-0.28	0.293
FLJ43663	TSHZ3	-0.282	0.347
FMNL3	TSHZ3	-0.381	0.362
FSTL5	MCM3	-0.282	0.268
FSTL5	MTSS1	-0.268	0.319
FSTL5	PIGC	-0.306	0.263
FSTL5	ST6GAL1	-0.276	0.271
FRAS1	TSHZ3	-0.264	0.258
FSTL4	TSHZ3	-0.255	0.283
FRAS1	ULBP1	-0.252	0.26
FYTTD1	LCA5	-0.274	0.297
FUT9	PPTC7	-0.272	0.277
FYTTD1	PVR	-0.251	0.278
FZD10	RAB30	-0.299	0.255
FYTTD1	TSHZ3	-0.298	0.46
GAB1	TSHZ3	-0.287	0.347
GATA3	IGF1	-0.337	0.25
GATA3	IRF8	-0.31	0.26
GATA3	JAK1	-0.336	0.257
GATA3	KIAA0922	-0.299	0.251
GATA3	LFNG	-0.286	0.425
GATA3	LPAR5	-0.296	0.3
GATA3	MTSS1	-0.296	0.323
GATA3	NFKBIE	-0.342	0.371
GATA3	NRM	-0.339	0.372
GATA3	ORAI2	-0.327	0.277
GATA3	PALM2-AKAP2	-0.291	0.262
GATA3	PIGC	-0.373	0.291
GATA3	RAN	-0.257	0.3
GATA3	SDPR	-0.308	0.27
GATA3	ST6GAL1	-0.401	0.339
GATA3	TOM1L2	-0.27	0.327
GATA3	TRAF5	-0.358	0.264
GCM2	GRB2	-0.268	0.319
GHR	GRB2	-0.294	0.355
GCM2	OAS1	-0.281	0.262
GHR	OAS1	-0.339	0.262
GJB7	TSHZ3	-0.344	0.255
GKN1	ZFP30	-0.281	0.282
GPR15	MTHFD2	-0.251	0.253
GPR176	TSHZ3	-0.27	0.257
GRB2	HOXC13	-0.301	0.306
GRB2	HOXD12	-0.293	0.26
GRB2	HRASLS5	-0.253	0.265
GRB2	HTR1A	-0.289	0.268
GRB2	INA	-0.264	0.252
GRB2	KCNJ3	-0.266	0.369
GRB2	LOC401097	-0.281	0.271
GRB2	LOC440925	-0.361	0.258
GRB2	LRAT	-0.277	0.361
GRB2	MKX	-0.275	0.357
GRB2	MPV17L	-0.274	0.344
GRB2	NCAM2	-0.325	0.278
GRB2	NEFL	-0.256	0.281
GRB2	NKX2-2	-0.335	0.297
GRB2	NKX2-6	-0.297	0.33
GRB2	PAX7	-0.317	0.251
GRB2	PCDH11X	-0.34	0.385
GRB2	PHACTR3	-0.277	0.46
GRB2	PLA2G7	-0.252	0.376
GRB2	PRPF31	-0.252	0.253
GRB2	RND3	-0.286	0.272
GRB2	RPL26L1	-0.261	0.337
GRB2	SATB2	-0.311	0.406
GRB2	SIGIRR	-0.257	0.316
GRB2	SIM2	-0.273	0.306
GRB2	SIX2	-0.281	0.253
GRB2	SLC5A7	-0.304	0.275
GRB2	SLC7A10	-0.375	0.297
GSTM4	SNORA19	-0.283	0.254
GRB2	SOX21	-0.319	0.29
GRB2	STC2	-0.255	0.256
GRB2	TLX3	-0.254	0.255
GRB2	TMEM132E	-0.284	0.275
GRB2	TMPRSS2	-0.307	0.349
GRB2	ZDBF2	-0.266	0.337
GRB2	ZNF560	-0.276	0.357
HACE1	LCA5	-0.261	0.324
H3F3C	TSHZ3	-0.264	0.303
HAND1	MSH3	-0.263	0.294
HAND1	OAS1	-0.311	0.302
HAND1	PPM1H	-0.316	0.251
HAPLN2	SLC18A1	-0.272	0.256
HIP1	LCA5	-0.272	0.335
HERPUD1	LOC400940	-0.274	0.275
HELT	OAS1	-0.272	0.256
HIP1	TSHZ3	-0.261	0.396
HIST1H3J	LCA5	-0.286	0.251
HNRNPA3P1	KCNK13	-0.316	0.274
HNRNPA3P1	LCA5	-0.301	0.298
HORMAD1	MTHFD2	-0.26	0.257
HOOK1	MTSS1	-0.252	0.266
HNRNPA3P1	PPP1R1A	-0.274	0.288
HNRNPC	TSHZ3	-0.281	0.323
HNRNPA3P1	ZNF701	-0.275	0.282
HSD11B1	MTHFD2	-0.251	0.255
HPCAL1	TSHZ3	-0.279	0.449
HYAL4	OTOP2	-0.263	0.259
HSP90AB2P	POLE2	-0.273	0.286
HVCN1	SP5	-0.251	0.321
IGF1	LCA5	-0.268	0.323
IGF1	TSHZ3	-0.339	0.34
IL21R	LCA5	-0.3	0.277
IKBIP	SNORA19	-0.274	0.27
IL21R	TSHZ3	-0.323	0.335
IL21	ZFP30	-0.282	0.273
IL21R	ZNF334	-0.254	0.256
IL4I1	TSHZ3	-0.286	0.323
IRF8	LCA5	-0.297	0.27
IRGQ	MIR1307	-0.271	0.258
IRX4	RAB30	-0.271	0.265
IRX4	SLC1A2	-0.269	0.263
IRF8	SLC7A10	-0.257	0.372
IRX4	TMEM129	-0.305	0.27
IPO4	TMEM212	-0.269	0.287
IRF2	TSHZ3	-0.298	0.262
IRF8	TSHZ3	-0.433	0.313
ISG20	TSHZ3	-0.301	0.264
IPO4	ZSCAN5A	-0.256	0.25
ITPKB	STEAP2	-0.268	0.301
JAK1	TSHZ3	-0.352	0.377
KCNJ3	OAS1	-0.287	0.272
KCNK13	TMCO5A	-0.259	0.253
KCNC4	TSHZ3	-0.258	0.283
KCNMA1	ZFP30	-0.277	0.252
KIAA0226	PVR	-0.284	0.318
KIAA0226	STEAP2	-0.276	0.29
KIAA0226	TSHZ3	-0.449	0.405
KIAA0247	TSHZ3	-0.268	0.406
KIAA0226	ZNF334	-0.285	0.388
KIAA0922	TSHZ3	-0.324	0.397
KIF3B	KITLG	-0.252	0.281
KIF3B	LVRN	-0.267	0.274
KISS1	MAL	-0.285	0.253
KIF3B	PCLO	-0.275	0.288
KIF3B	ROBO2	-0.28	0.253
KIAA1949	TSHZ3	-0.278	0.288
KIF3B	TSHZ3	-0.308	0.329
KLC1	TSHZ3	-0.329	0.312
KRT34	MAL	-0.291	0.282
LARP6	LCA5	-0.281	0.284
KRTAP4-2	MTHFD2	-0.289	0.276
LCA5	LETMD1	-0.285	0.258
LCA5	LOC202781	-0.26	0.268
LCA5	MCM3	-0.283	0.363
LCA5	MED26	-0.339	0.385
LCA5	MFSD4	-0.321	0.261
LCA5	MIR549	-0.312	0.27
LCA5	MIR634	-0.411	0.269
LCA5	MYH4	-0.296	0.277
LCA5	NASP	-0.252	0.328
LCA5	OAS1	-0.29	0.445
LCA5	OR51B5	-0.33	0.256
LCA5	OR56A4	-0.268	0.284
LCA5	OR5M9	-0.263	0.265
LCA5	ORAI1	-0.281	0.362
LCA5	PI15	-0.293	0.282
LCA5	PIGC	-0.415	0.25
LCA5	PIM3	-0.281	0.259
LCA5	PLEKHF2	-0.296	0.398
LCA5	POLM	-0.252	0.293
LCA5	POLRMT	-0.323	0.252
LCA5	PPTC7	-0.277	0.432
LFNG	PVR	-0.338	0.327
LCA5	RFC2	-0.289	0.304
LCA5	RGS13	-0.292	0.252
LCA5	SF3A2	-0.269	0.369
LCA5	SLC1A2	-0.286	0.446
LCA5	SMPD4	-0.263	0.303
LCA5	SNHG4	-0.274	0.283
LCA5	SPATS2L	-0.278	0.314
LCA5	ST6GAL1	-0.42	0.313
LCA5	STX7	-0.274	0.408
LCA5	SYK	-0.259	0.356
LCA5	TAL2	-0.271	0.364
LCA5	TMEM154	-0.265	0.312
LDLRAP1	TSHZ3	-0.252	0.291
LFNG	TSHZ3	-0.407	0.41
LCA5	TTR	-0.28	0.27
LCA5	UCKL1AS	-0.388	0.268
LCA5	VPS33A	-0.328	0.253
LCA5	XRRA1	-0.298	0.255
LILRB4	PVR	-0.339	0.294
LIX1L	SNORA19	-0.264	0.268
LILRA2	TSHZ3	-0.278	0.415
LMNB1	MIR1307	-0.256	0.251
LOC100129794	RAB30	-0.291	0.288
LMBRD1	TSHZ3	-0.323	0.284
LOC100240726	7-Mar	-0.258	0.259
LOC100271836	TSHZ3	-0.266	0.258
LOC150776	SNORD114-16	-0.253	0.252
LOC283404	TSHZ3	-0.27	0.33
LOC344967	SNORA19	-0.253	0.252
LOC400804	MAL	-0.255	0.271
LOC642587	SLC6A2	-0.275	0.261
LOC728743	MORN4	-0.265	0.268
LPAL2	MTHFD2	-0.277	0.256
LPPR4	MYH4	-0.256	0.265
LOC728743	PVR	-0.351	0.27
LOC728743	SATB2	-0.269	0.321
LPPR4	SCN3A	-0.252	0.254
LOC728743	STEAP2	-0.408	0.252
LPAR5	TSHZ3	-0.31	0.307
LPCAT1	TSHZ3	-0.302	0.308
LRAT	MSH3	-0.252	0.252
LRAT	OAS1	-0.327	0.275
LRAT	TMEM129	-0.265	0.256
LRRC16A	TSHZ3	-0.265	0.328
MAL	ODZ4	-0.279	0.266
MAL	PI15	-0.291	0.274
MAL	RAB11FIP5	-0.261	0.265
MAL	RAPGEF4	-0.287	0.251
MAL	RBMS3	-0.251	0.272
MACC1	TSHZ3	-0.254	0.261
MAP3K1	TSHZ3	-0.261	0.434
MAP4K4	TSHZ3	-0.279	0.312
MDFIC	NCKAP1	-0.267	0.252
MCM3	PCDH11X	-0.323	0.258
MCM3	RALYL	-0.254	0.286
MCART1	TSHZ3	-0.28	0.357
MDC1	TSHZ3	-0.304	0.308
ME1	NOLC1	-0.263	0.257
ME1	SF3A2	-0.292	0.305
MED26	TSHZ3	-0.283	0.38
MGC26647	MTHFD2	-0.253	0.25
MIA	STEAP2	-0.277	0.272
MGC102966	TSHZ3	-0.321	0.297
MGC102966	ZNF334	-0.279	0.264
MIR103-1	MTHFD2	-0.251	0.327
MIR1208	TSHZ3	-0.253	0.284
MIR100	ZFP30	-0.272	0.267
MIR1307	MTHFD2	-0.26	0.384
MIR1307	RAET1G	-0.264	0.259
MIR185	TSHZ3	-0.252	0.265
MIR1307	TYMS	-0.255	0.329
MIR1307	ULBP1	-0.312	0.256
MIR1307	WDTC1	-0.299	0.286
MIR1973	MTHFD2	-0.295	0.271
MIR196B	RAB30	-0.317	0.282
MIR203	RAB30	-0.275	0.279
MIR217	SCAND1	-0.258	0.253
MIR196B	SDPR	-0.268	0.279
MIR196B	SLC1A2	-0.287	0.269
MIR196B	TMEM154	-0.262	0.251
MIR196B	UBE2N	-0.264	0.32
MIR580	RPAP2	-0.262	0.269
MIR580	TUBA4B	-0.264	0.259
MIR548A2	ZFP30	-0.272	0.282
MIR591	MTHFD2	-0.255	0.25
MIR599	MTHFD2	-0.257	0.252
MIR644	MTHFD2	-0.274	0.252
MIR875	MTHFD2	-0.257	0.252
MIR624	PVR	-0.371	0.384
MIR603	TSHZ3	-0.316	0.343
MKNK2	STEAP2	-0.253	0.259
MIR922	TMC7	-0.285	0.272
MKNK2	TSHZ3	-0.327	0.289
MIR944	WDTC1	-0.264	0.254
MPEG1	MYO3A	-0.287	0.272
MPEG1	NCKAP1	-0.281	0.289
MPV17L	OAS1	-0.278	0.259
MPEG1	PTPRM	-0.298	0.25
MPEG1	STEAP2	-0.264	0.336
MTERFD2	NCKAP1	-0.329	0.274
MTHFD2	PHLPP2	-0.271	0.281
MTERFD2	PPFIA2	-0.306	0.26
MTHFD2	PRH1	-0.252	0.291
MTERFD2	PVR	-0.313	0.421
MTHFD2	PUM2	-0.253	0.299
MTHFD2	R3HDM2	-0.279	0.259
MTHFD2	RC3H1	-0.276	0.285
MTHFD2	RPL19P12	-0.26	0.316
MTHFD2	RPTN	-0.268	0.251
MTHFD2	SGK269	-0.275	0.267
MTHFD2	SIPA1L2	-0.259	0.26
MTHFD2	SLC16A7	-0.28	0.253
MTERFD2	SLC6A2	-0.325	0.252
MTHFD2	SNORD114-27	-0.253	0.283
MTHFD2	SPINK9	-0.259	0.262
MTERFD2	STEAP2	-0.352	0.269
MTHFD2	STX19	-0.265	0.275
MTHFD2	TDO2	-0.274	0.255
MTHFD2	TMEM212	-0.304	0.29
MSH3	TSHZ3	-0.273	0.371
MTHFD2	TSHB	-0.298	0.271
MTHFD2	TSPAN5	-0.253	0.267
MTHFD2	TSPAN8	-0.259	0.261
MTHFD2	UTRN	-0.252	0.289
MTHFD2	XCR1	-0.341	0.256
MTHFD2	ZFAND3	-0.256	0.25
MTHFD2	ZRANB1	-0.251	0.292
MTSS1	NCAM2	-0.251	0.263
MTSS1	PVR	-0.258	0.401
MTSS1	SPEF2	-0.27	0.285
MTSS1	TSHZ3	-0.461	0.314
MYBPHL	TSHZ3	-0.274	0.363
NCKAP1	OR6Y1	-0.258	0.256
NCAM2	PLEKHF2	-0.284	0.255
NCAM2	PPTC7	-0.274	0.254
NCAM2	RAB30	-0.257	0.322
NAV2	TSHZ3	-0.36	0.254
NCRNA00207	RASD1	-0.267	0.256
NCR3	STEAP2	-0.269	0.272
NDUFB8	TSHZ3	-0.26	0.325
NIN	TSHZ3	-0.259	0.422
NPY5R	OAS1	-0.255	0.308
NRCAM	OTOP2	-0.299	0.254
NRXN2	TSHZ3	-0.277	0.29
OAS1	ONECUT2	-0.277	0.304
OAS1	OTOP2	-0.298	0.309
OAS1	PCDH11X	-0.275	0.277
OAS1	PLA2G7	-0.254	0.289
OAS1	PRDM14	-0.253	0.281
OAS1	psiTPTE22	-0.272	0.257
OAS1	RIPPLY2	-0.263	0.302
OAS1	RPL26L1	-0.32	0.25
OAS1	SALL1	-0.307	0.333
OAS1	SATB2	-0.291	0.299
OAS1	SFTA3	-0.265	0.273
OC90	SLC6A2	-0.251	0.259
OAS1	TMPRSS2	-0.272	0.302
NUP62	TSHZ3	-0.436	0.267
OAS1	TSHZ3	-0.429	0.372
ODZ4	TSHZ3	-0.273	0.27
OAS1	ZDBF2	-0.311	0.255
OAS1	ZNF214	-0.254	0.319
OAS1	ZNF354C	-0.27	0.278
OAS1	ZNF560	-0.266	0.294
OAS1	ZNF880	-0.267	0.283
OR14A16	PI4K2B	-0.252	0.282
OR2AK2	TSHZ3	-0.284	0.25
OR51B5	PPP1R1A	-0.26	0.283
OR51S1	PPFIA2	-0.271	0.252
OR52W1	PVR	-0.337	0.276
OR51S1	SLC6A2	-0.261	0.26
OR52B2	SLC6A2	-0.258	0.254
ORAI2	PVR	-0.252	0.279
OR6Y1	SLC6A2	-0.257	0.253
OR7C1	ZFP30	-0.273	0.283
OR8D2	ZFP30	-0.278	0.295
OTOP2	PPM1H	-0.27	0.272
OTOP2	TBL1XR1	-0.26	0.267
OSBPL3	TSHZ3	-0.289	0.263
PALM2-AKAP2	TSHZ3	-0.414	0.305
PAQR8	TSHZ3	-0.333	0.305
PARP1	TSHZ3	-0.251	0.407
PARP6	TSHZ3	-0.327	0.259
PCDH11X	UCKL1AS	-0.268	0.272
PECAM1	PVR	-0.281	0.262
PDE8A	TSHZ3	-0.272	0.25
PEA15	TSHZ3	-0.339	0.482
PHACTR3	ST6GAL1	-0.32	0.258
PI4K2B	PLSCR5	-0.271	0.283
PI4K2B	SCARNA6	-0.255	0.25
PI4K2B	SLCO1B3	-0.26	0.26
PLEKHF2	SLC5A7	-0.269	0.251
PLIN3	STEAP2	-0.253	0.27
PLCG2	TSHZ3	-0.274	0.273
PLIN3	TSHZ3	-0.319	0.254
PLEKHF2	ZDBF2	-0.282	0.252
POLM	ROBO2	-0.277	0.261
PMS2L1	SNORA19	-0.251	0.287
POLRMT	TSHZ3	-0.286	0.318
PPP1R1A	RAB11FIP5	-0.265	0.296
PPM1H	SALL1	-0.301	0.276
PPP1R1A	SLC17A1	-0.271	0.278
PPP1R1A	TM4SF4	-0.261	0.255
PPM1H	TSHZ3	-0.297	0.387
PPM1H	ZDBF2	-0.262	0.258
PRC1	TSHZ3	-0.262	0.348
PUS3	SF3A2	-0.26	0.268
PTPN6	STEAP2	-0.307	0.263
PVR	TIGIT	-0.289	0.252
PVR	TMEM129	-0.285	0.3
PVR	TNFRSF1B	-0.291	0.265
PTPN6	TSHZ3	-0.349	0.256
PTPRM	TTPAL	-0.281	0.255
PVR	UCKL1AS	-0.315	0.309
PVR	ZFP106	-0.273	0.269
RAB30	SP5	-0.294	0.344
RAB24	TSHZ3	-0.332	0.263
RAB30	TSHZ3	-0.359	0.436
PYHIN1	ZFP30	-0.277	0.266
RASSF3	TSHZ3	-0.272	0.385
RBM47	TSHZ3	-0.255	0.462
RGS6	TMEM196	-0.269	0.251
RFC1	TSHZ3	-0.295	0.302
RFC2	TSHZ3	-0.285	0.425
RGS6	TSHZ3	-0.338	0.272
RHBDD3	VAMP3	-0.272	0.258
RHOBTB2	TSHZ3	-0.253	0.253
RPL23A	TSHZ3	-0.307	0.273
SAPS1	SNORA19	-0.285	0.287
SALL1	ST6GAL1	-0.268	0.271
SATB2	ST6GAL1	-0.288	0.25
SCAMP2	TSHZ3	-0.421	0.298
SAPS1	WDR72	-0.258	0.277
SAMD3	ZFP30	-0.293	0.27
SCAMP2	ZNF334	-0.256	0.323
SCARNA17	SNORA19	-0.296	0.258
SCD5	TSHZ3	-0.258	0.321
SCRN2	TSHZ3	-0.256	0.348
SCGB3A2	ZFP30	-0.28	0.253
SDCBP2	TSHZ3	-0.275	0.382
SDPR	TSHZ3	-0.267	0.466
SEC14L1	TSHZ3	-0.45	0.342
SEMA7A	TSHZ3	-0.373	0.299
4-Sep	TSHZ3	-0.313	0.284
SGTB	TFDP3	-0.291	0.26
SIRPG	TSHZ3	-0.313	0.285
SKI	TSHZ3	-0.32	0.26
SLC12A1	ZFP30	-0.256	0.275
SLC18A1	ZFP30	-0.304	0.266
SLC1A2	TSHZ3	-0.295	0.415
SLC35E1	SNORA19	-0.284	0.254
SLC6A2	ZFP106	-0.282	0.251
SNORA19	TACO1	-0.256	0.26
SNORA19	TEX264	-0.302	0.292
SNORA19	UCHL5	-0.308	0.265
SNORA19	ZNF643	-0.304	0.254
SNORD110	ZNF804B	-0.269	0.254
SNORD58B	ZNF518A	-0.256	0.272
SP5	TMEM129	-0.289	0.338
ST6GAL1	STEAP2	-0.299	0.414
STEAP2	TMEM129	-0.325	0.274
STEAP2	TOM1L2	-0.28	0.255
STEAP2	TRAF5	-0.311	0.312
ST3GAL2	TSHZ3	-0.277	0.394
ST6GALNAC3	TSHZ3	-0.277	0.26
ST6GALNAC4	TSHZ3	-0.392	0.316
STIM2	TSHZ3	-0.279	0.362
STEAP2	UCKL1AS	-0.354	0.282
ST6GALNAC4	ZNF334	-0.255	0.253
STRN4	TSHZ3	-0.262	0.314
STX7	TSHZ3	-0.325	0.416
TAL2	TSHZ3	-0.42	0.294
TAF10	ZNF334	-0.256	0.299
TBXAS1	TSHZ3	-0.266	0.355
TFDP3	TPI1	-0.277	0.251
TFDP3	ZNF845	-0.26	0.255
TMEM129	TSHZ3	-0.437	0.352
TMEM154	TSHZ3	-0.367	0.355
TMEM71	TSHZ3	-0.34	0.284
TMTC2	TSHZ3	-0.344	0.273
TNFAIP8	ZNF334	-0.262	0.254
TPD52	TSHZ3	-0.29	0.332
TSHZ3	TSPAN33	-0.324	0.261
TSHZ3	TTPAL	-0.257	0.292
TSHZ3	UBE2Z	-0.282	0.285
TSHZ3	UCKL1AS	-0.406	0.404
TSHZ3	ULK4	-0.259	0.285
TSHZ3	UTS2D	-0.359	0.314
TSHZ3	UXS1	-0.252	0.327
TSHZ3	VCAM1	-0.276	0.267
TSHZ3	VPS33A	-0.268	0.391
TSHZ3	ZNF500	-0.465	0.29
TSHZ3	ZNF853	-0.28	0.276
CDK20	HVCN1	-0.261	0.511
CNTN5	GRB2	-0.267	0.542
CRY1	GRB2	-0.252	0.599
GATA3	LOC728743	-0.264	0.525
GRB2	LCA5	-0.36	0.505
GRB2	PVR	-0.32	0.692
GRB2	STEAP2	-0.258	0.573
HVCN1	TSHZ3	-0.376	0.55
IFNGR1	TSHZ3	-0.259	0.543
LCA5	UBE2N	-0.274	0.533
NR3C1	TSHZ3	-0.27	0.5
PVR	ZC3H7A	-0.255	0.563
TSHZ3	UBE2N	-0.288	0.501
ABCC3	CD79B	-0.081	0.516
ABI1	CNTN5	-0.018	0.527
ABI1	PPP1R1A	-0.002	0.502
ABCF3	SNORA19	-0.039	0.513
ACADL	IFNGR1	-0.05	0.519
ACSS3	MCM3	-0.055	0.511
ACSS3	PPTC7	-0.032	0.563
ACSS3	SF3A2	-0.036	0.528
ADAMTS5	IFNGR1	-0.012	0.536
ADAM19	PPP1R1A	-0.002	0.529
ADAM19	PVR	-0.053	0.58
ADAMTS12	PVR	-0.021	0.536
ADAM22	VAMP3	-0.002	0.503
AGPAT6	CDK20	-0.141	0.518
AGPAT6	CRY1	-0.001	0.611
AHCY	GRB2	-0.017	0.501
AGPAT6	LCA5	-0.123	0.528
AKR1CL1	PVR	-0.065	0.549
AKR1D1	PVR	-0.031	0.515
AKIRIN2	TSHZ3	-0.119	0.503
ALDH1A2	CPS1	-0.005	0.5
ALKBH5	ETV1	-0.084	0.546
ALDH1A2	GRB2	-0.101	0.55
ALKBH5	PVR	-0.025	0.547
ALDH1A2	RAB30	-0.036	0.557
ALDH1A2	TMTC2	-0.015	0.508
ANGPT4	CNTN5	-0.034	0.505
ANGPT4	FLRT2	-0.041	0.52
ANGPT4	PVR	-0.076	0.5
ANGPT4	STEAP2	-0.085	0.52
AP1S3	CRY1	-0.042	0.604
APCDD1L	GRB2	-0.117	0.506
ANO6	LCA5	-0.024	0.507
AP1S3	NCKAP1	-0.094	0.54
AP1S3	PPFIA2	-0.046	0.522
AP1S3	PVR	-0.058	0.693
AP1S3	SLC6A2	-0.085	0.504
APOD	CDK20	-0.094	0.502
ARF3	ZNF33B	-0.006	0.507
ARHGAP17	MN1	-0.076	0.52
ARMC2	TSHZ3	-0.045	0.549
ARSG	C17orf102	-0.01	0.505
ARPP-21	PVR	-0.056	0.519
ARSG	TSHZ3	-0.037	0.51
ATP1A1	C17orf102	-0.139	0.514
ATP1A1	CNTN5	-0.078	0.506
ATP1A1	CWH43	-0.093	0.5
ATP1A1	ETV1	-0.149	0.511
ATP1A1	LCA5	-0.186	0.529
ATP1A1	PCDH11X	-0.109	0.5
ATP1B2	SLC1A2	-0.003	0.503
ATP1A1	STEAP2	-0.055	0.554
ATP5J2	ZNF33B	-0.002	0.5
ATP6V1H	CDK20	-0.004	0.554
ATXN1	SLC6A2	-0.05	0.526
BATF3	LCA5	-0.051	0.541
BHLHE41	LCA5	-0.061	0.561
BCL11A	TSHZ3	-0.113	0.503
BEND4	TSHZ3	-0.052	0.619
BDNFOS	ZFP30	-0.005	0.5
BMPR1B	FLJ43663	-0.001	0.503
BMP2	GRB2	-0.023	0.531
BMPR1B	GRB2	-0.042	0.555
BRD7	MTHFD2	-0.014	0.511
C10orf119	C17orf102	-0.01	0.547
C10orf104	GATA3	-0.14	0.556
BUB1B	TSHZ3	-0.092	0.542
C10orf84	TSHZ3	-0.053	0.529
C12orf68	KIAA1826	-0.006	0.521
C12orf74	PVR	-0.228	0.565
C17orf102	CCNG2	-0.07	0.584
C17orf102	CLIC4	-0.101	0.501
C17orf102	CLN6	-0.084	0.544
C17orf102	DUSP12	-0.015	0.527
C17orf102	FIG4	-0.027	0.517
C17orf102	FLJ32065	-0.02	0.56
C17orf102	FYTTD1	-0.018	0.587
C17orf102	HBS1L	-0.003	0.532
C17orf102	HERPUD1	-0.039	0.538
C17orf102	IFNGR1	-0.089	0.595
C17orf102	IFT57	-0.165	0.508
C17orf102	LILRA2	-0.085	0.538
C17orf102	LYSMD2	-0.031	0.552
C17orf102	MED26	-0.129	0.51
C17orf102	PPTC7	-0.059	0.565
C17orf102	RAB30	-0.207	0.538
C17orf102	RRAS2	-0.035	0.512
C17orf102	SDCBP2	-0.132	0.554
C17orf102	SLC12A6	-0.015	0.534
C17orf102	SSH2	-0.034	0.567
C17orf102	STX7	-0.124	0.569
C17orf102	TICAM2	-0.049	0.519
C17orf102	TMED7-TICAM2	-0.004	0.603
C17orf102	UBE2G1	-0.082	0.515
C17orf102	UBE2N	-0.115	0.587
C17orf102	VSIG10	-0.019	0.567
C16orf62	ZNF33B	-0.003	0.6
C18orf20	PVR	-0.017	0.525
C1orf113	ETV1	-0.066	0.52
C1orf105	SPEF2	-0.009	0.516
C21orf67	CRY1	-0.152	0.514
C21orf58	SNORA19	-0.015	0.5
C4orf22	EWSR1	-0.015	0.525
C3orf54	LCA5	-0.045	0.518
C2orf66	PVR	-0.03	0.513
C6orf106	CDK20	-0.049	0.577
C6orf136	PVR	-0.07	0.514
C6orf136	SLC6A2	-0.001	0.511
C4orf51	ZFP30	-0.007	0.5
C5orf13	ZFP30	-0.03	0.501
C7orf58	SLC6A2	-0.044	0.546
C6orf222	TMC7	-0.002	0.521
C8orf46	CXCL12	-0.016	0.538
C8orf48	DEK	-0.002	0.543
C8orf83	ELL3	-0.015	0.506
C9orf130	GATA3	-0.053	0.543
C9orf6	KIAA1826	-0.015	0.532
C8orf34	PVR	-0.023	0.525
C8orf46	PVR	-0.132	0.602
CAMSAP1L1	EPB41L3	-0.058	0.503
CAMSAP1L1	FSTL5	-0.008	0.511
CAMSAP1L1	HOOK1	-0.002	0.517
CAPS2	LOC400940	-0.003	0.523
CAMK2D	TSHZ3	-0.059	0.604
CCDC126	LCA5	-0.006	0.503
CCDC50	PVR	-0.09	0.522
CCNG2	ETV1	-0.034	0.609
CCNG2	GATA3	-0.042	0.539
CCNG2	LCA5	-0.171	0.512
CCNG2	LRAT	-0.039	0.51
CCNG2	RALYL	-0.017	0.527
CCRN4L	SNORA19	-0.002	0.506
CCNG2	STEAP2	-0.045	0.513
CCNG2	TSHZ3	-0.215	0.519
CCNG2	ZDBF2	-0.002	0.51
CD74	GATA3	-0.045	0.547
CD82	KCNF1	-0.001	0.511
CD200R1	PVR	-0.02	0.623
CD79B	UNCX	-0.014	0.547
CD79B	ZIC2	-0.033	0.505
CDGAP	CDK20	-0.034	0.575
CDK20	CLIC5	-0.049	0.51
CDK20	CTNNA1	-0.014	0.504
CDK20	DNMBP	-0.077	0.516
CDK2	ETV1	-0.001	0.52
CDK20	FAM160A1	-0.016	0.514
CDK20	GGA2	-0.015	0.505
CDK20	GNE	-0.064	0.512
CDK20	GPR160	-0.004	0.526
CDK20	GSG1	-0.019	0.522
CDK20	HIVEP1	-0.046	0.516
CDK20	HN1	-0.073	0.531
CDK20	IL12RB2	-0.006	0.521
CDK20	LOC285740	-0.018	0.51
CDK20	MAP3K1	-0.145	0.547
CDK20	MAP4K4	-0.098	0.533
CDK20	MYO5C	-0.004	0.523
CDK20	NIN	-0.096	0.52
CDK20	NRCAM	-0.06	0.503
CDK20	OSBPL10	-0.006	0.523
CDK20	OSBPL8	-0.017	0.554
CDK20	PARD3B	-0.048	0.513
CDK20	RFC1	-0.109	0.57
CDK20	RFWD2	-0.039	0.528
CDK20	RHOQ	-0.023	0.531
CDK20	SLC38A1	-0.068	0.504
CDK20	SLC4A4	-0.005	0.514
CDK20	SYNM	-0.045	0.507
CDK20	TBC1D7	-0.033	0.565
CDKL2	TSHZ3	-0.009	0.505
CDK20	VAV3	-0.097	0.501
CDK20	VSIG10	-0.028	0.527
CDK20	XRCC5	-0.012	0.553
CDK20	YBX1	-0.054	0.503
CDK20	ZNF608	-0.014	0.555
CENPM	GATA3	-0.15	0.534
CHDH	PVR	-0.052	0.549
CHN2	PVR	-0.021	0.525
CHN2	SLC6A2	-0.012	0.57
CLEC17A	CWH43	-0.024	0.526
CLN6	EPHA7	-0.008	0.507
CLIC4	ETV1	-0.008	0.575
CLN6	ETV1	-0.065	0.61
CLEC17A	FLRT2	-0.003	0.525
CLN6	FLRT2	-0.003	0.554
CLN6	FSTL5	-0.058	0.502
CLN6	GATA3	-0.062	0.546
CLSPN	LCA5	-0.003	0.518
CLN6	LRAT	-0.025	0.508
CLN6	LRFN5	-0.006	0.532
CLEC17A	PPP1R1A	-0.034	0.553
CLEC17A	PVR	-0.166	0.591
CLEC1A	PVR	-0.104	0.533
CLEC7A	PVR	-0.033	0.598
CLRN1	PVR	-0.015	0.516
CLEC17A	SLC6A2	-0.046	0.575
CLIC4	STEAP2	-0.055	0.508
CNBD1	CXCL12	-0.023	0.502
CNTN5	FLJ43663	-0.062	0.506
CLVS1	GRB2	-0.012	0.543
CNTN5	HVCN1	-0.087	0.527
CNTN5	MDC1	-0.082	0.507
CNTN5	NR3C1	-0.049	0.512
CNBD1	PVR	-0.051	0.524
CNTN5	RAB30	-0.045	0.534
CNTN5	SLC1A2	-0.024	0.529
CNTN5	UBE2N	-0.075	0.517
COG8	EDIL3	-0.053	0.506
CORO1C	ETV1	-0.009	0.526
COL25A1	GRB2	-0.068	0.598
COPS7B	KIAA1826	-0.018	0.512
COL22A1	PVR	-0.032	0.524
COL9A2	TSHZ3	-0.097	0.535
CPA3	PVR	-0.002	0.53
CPS1	SLC6A2	-0.012	0.525
CRY1	DEFB133	-0.012	0.512
CRY1	DEK	-0.018	0.597
CRY1	EMP1	-0.075	0.503
CRY1	FMNL3	-0.03	0.583
CSK	GATA3	-0.039	0.515
CRY1	HVCN1	-0.062	0.519
CRY1	JAK1	-0.002	0.549
CRY1	KIAA0922	-0.017	0.604
CSDA	LCA5	-0.026	0.508
CRY1	LOC100286948	-0.036	0.53
CRY1	LRRTM2	-0.001	0.505
CRY1	MCM5	-0.05	0.511
CRY1	MIR941-2	-0.049	0.507
CRY1	MIR941-3	-0.049	0.507
CRY1	OAS1	-0.134	0.541
CRY1	TGFBR2	-0.016	0.535
CRY1	TNFRSF10A	-0.111	0.505
CSDA	TSHZ3	-0.058	0.505
CTSL2	GRB2	-0.023	0.506
CWH43	HVCN1	-0.013	0.53
CXCL12	PLEKHF2	-0.038	0.516
CWH43	RASSF3	-0.004	0.507
CXCL12	ST6GAL1	-0.078	0.522
CXCL16	TSHZ3	-0.007	0.5
CYBASC3	GATA3	-0.119	0.521
CYP24A1	HVCN1	-0.096	0.502
CYP4B1	PVR	-0.014	0.546
CYTH1	SLC6A2	-0.01	0.5
DBX2	IFNGR1	-0.015	0.503
DDX17	GRB2	-0.098	0.563
DDI2	LCA5	-0.003	0.55
DDX17	PEA15	-0.022	0.512
DEK	ETV1	-0.166	0.569
DHX15	LCA5	-0.038	0.53
DEK	OTOP2	-0.029	0.515
DEFB135	PVR	-0.054	0.502
DEK	ZSCAN21	-0.023	0.537
DKK2	GAPDH	-0.003	0.501
DKK2	LILRA2	-0.001	0.577
DKK2	PPTC7	-0.036	0.524
DLG5	PVR	-0.039	0.537
DKK2	RAB30	-0.043	0.508
DKK2	UBE2N	-0.014	0.582
DNAH6	GRB2	-0.012	0.55
DNAJC14	LCA5	-0.06	0.503
DNAJC9	LCA5	-0.068	0.509
DNA2	ZNF33B	-0.006	0.506
DSEL	GRB2	-0.153	0.504
DSEL	KIAA0247	-0.015	0.51
DSEL	UBE2N	-0.016	0.531
E2F5	GATA3	-0.023	0.507
DUSP16	LCA5	-0.033	0.551
DZIP1L	LCA5	-0.019	0.506
DZIP1L	TSHZ3	-0.078	0.504
DYDC2	UBE2N	-0.017	0.561
EBF2	HVCN1	-0.045	0.501
EBF2	LILRA2	-0.018	0.519
ECT2L	SLC6A2	-0.007	0.524
EDEM1	TSHZ3	-0.036	0.542
ELF2	MTHFD2	-0.026	0.537
EIF3F	ZNF33B	-0.008	0.595
EPB41L3	FMNL3	-0.037	0.514
EPB41L3	GRB2	-0.107	0.504
EMP1	PVR	-0.046	0.619
EN1	STX7	-0.005	0.511
ELOVL5	TSHZ3	-0.099	0.538
EPGN	GRB2	-0.05	0.516
EPHX2	MCM3	-0.012	0.507
EPHX2	SLC1A2	-0.005	0.529
EPHA7	STX7	-0.001	0.545
EPS15L1	TSHZ3	-0.132	0.517
EPHA6	UBE2N	-0.015	0.558
ETV1	FYTTD1	-0.023	0.623
ETV1	HERPUD1	-0.073	0.524
ETV1	IFNGR1	-0.076	0.633
ETV1	IFT57	-0.064	0.594
ETV1	ITSN2	-0.038	0.534
ETV1	LILRA2	-0.09	0.607
ETV1	LMBRD1	-0.116	0.548
ETV1	MED26	-0.137	0.556
ETV1	PEA15	-0.197	0.505
ETV1	PHYH	-0.026	0.519
ETV1	PPTC7	-0.107	0.519
ETV1	PRKAB1	-0.028	0.58
ETV1	PRMT1	-0.001	0.538
EZR	PVR	-0.052	0.572
ETV1	RAB30	-0.138	0.6
ETV1	RASSF3	-0.099	0.524
ETV1	RBM18	-0.069	0.505
ETV1	RRAS2	-0.002	0.5
ETV1	S1PR2	-0.047	0.503
ETV1	SDCBP2	-0.046	0.639
ETV1	SLC12A6	-0.02	0.51
ETV1	SLC1A2	-0.129	0.502
ETV1	STX7	-0.063	0.653
ETV1	UBE2G1	-0.053	0.586
ETV1	UBE2N	-0.111	0.617
ETV1	UGCG	-0.033	0.527
ETV1	VSIG10	-0.011	0.566
ETV1	WIPF2	-0.013	0.508
FAHD2B	FLJ41562	-0.01	0.502
FAM117B	LCA5	-0.013	0.521
FAHD2B	MIR1307	-0.001	0.521
FAM100B	PVR	-0.015	0.532
FAM13B	TSHZ3	-0.004	0.515
FAM175A	TSHZ3	-0.058	0.515
FAM195A	TSHZ3	-0.012	0.505
FAU	HDDC2	-0.022	0.504
FERMT2	TSHZ3	-0.017	0.529
FGF5	UBE2N	-0.051	0.503
FLJ32065	SP5	-0.015	0.503
FLJ45983	HERPUD1	-0.005	0.519
FMNL3	HOOK1	-0.057	0.505
FLJ45983	IFNGR1	-0.089	0.504
FMNL3	LCA5	-0.213	0.506
FLJ45983	LILRA2	-0.06	0.565
FMNL3	NCKAP1	-0.007	0.546
FMNL3	PCDH17	-0.029	0.508
FMNL3	PPP1R1A	-0.008	0.551
FMNL3	PVR	-0.097	0.615
FLJ45983	SDCBP2	-0.109	0.531
FMNL3	SLC6A2	-0.054	0.539
FLJ43663	STEAP2	-0.031	0.533
FLJ45983	ST3GAL2	-0.005	0.539
FMNL3	STEAP2	-0.109	0.549
FLJ45983	STX7	-0.083	0.511
FLRT2	STX7	-0.049	0.503
FLT3	TSHZ3	-0.088	0.524
FLRT2	UBE2N	-0.091	0.516
FLJ45983	UCKL1AS	-0.146	0.524
FSTL5	HVCN1	-0.047	0.532
FSTL5	IFNGR1	-0.018	0.593
FRAS1	SLC6A2	-0.023	0.51
FSTL5	STX7	-0.06	0.502
FYTTD1	SP5	-0.03	0.583
GABRA4	UBE2N	-0.008	0.51
FYTTD1	ZNF334	-0.027	0.538
GATA3	HERPUD1	-0.016	0.524
GATA3	HMGN3	-0.07	0.516
GATA3	HNRNPC	-0.024	0.558
GATA3	IFNGR1	-0.139	0.5
GATA3	IL21R	-0.059	0.619
GATA3	IL27RA	-0.031	0.558
GATA3	ITPKB	-0.105	0.57
GATA3	KIAA0226	-0.175	0.561
GATA3	KIF3B	-0.038	0.512
GBAS	LCA5	-0.031	0.502
GATA3	LILRA2	-0.119	0.556
GATA3	LMBRD1	-0.118	0.575
GATA3	MCM3	-0.005	0.511
GATA3	MED26	-0.056	0.604
GATA3	MEF2D	-0.024	0.537
GATA3	MFSD4	-0.064	0.52
GATA3	PLIN3	-0.074	0.582
GATA3	PPTC7	-0.016	0.547
GATA3	PTPN6	-0.003	0.686
GATA3	RBM18	-0.009	0.524
GATA3	RPL23A	-0.023	0.528
GATA3	SCAMP2	-0.163	0.558
GATA3	SDCBP2	-0.081	0.585
GATA3	SLC12A6	-0.012	0.517
GBAS	SNORA19	-0.023	0.512
GATA3	ST3GAL2	-0.006	0.586
GATA3	STX7	-0.091	0.541
GATA3	TMEM129	-0.146	0.622
GATA3	TNFAIP8	-0.012	0.529
GATA3	UBE2G1	-0.045	0.547
GATA3	UBE2N	-0.11	0.509
GATA3	UCKL1AS	-0.132	0.62
GATA3	VPS33A	-0.015	0.594
GHR	PEA15	-0.015	0.507
GHR	STX7	-0.001	0.546
GHR	TMEM129	-0.038	0.507
GGA3	TSHZ3	-0.121	0.536
GHR	UBE2N	-0.02	0.552
GKN1	PVR	-0.068	0.503
GKN2	PVR	-0.027	0.555
GNA14	GRB2	-0.093	0.519
GMPR	LCA5	-0.002	0.512
GNL3	PVR	-0.001	0.536
GPRC5B	GRB2	-0.085	0.515
GRB2	GRIK2	-0.004	0.587
GRB2	GUCY1B3	-0.008	0.534
GRB2	HS3ST2	-0.044	0.57
GRB2	KIAA1598	-0.009	0.568
GRB2	LOC400940	-0.076	0.616
GRB2	LOC642597	-0.113	0.511
GRB2	LRRC28	-0.007	0.509
GRB2	MN1	-0.097	0.581
GRB2	MORN4	-0.112	0.574
GRB2	MYO3A	-0.091	0.5
GRB2	NCKAP1	-0.158	0.591
GRB2	NLGN1	-0.014	0.644
GRB2	PCDH7	-0.111	0.574
GRB2	PLA2R1	-0.062	0.511
GRB2	PMP22	-0.071	0.563
GRB2	PPFIA2	-0.116	0.645
GRB2	PPP1R1A	-0.162	0.532
GRB2	PTH2R	-0.05	0.5
GRB2	PTPRM	-0.083	0.543
GRM1	RAB30	-0.005	0.51
GRB2	RALYL	-0.111	0.538
GRB2	RFX4	-0.014	0.586
GRB2	RHEB	-0.08	0.517
GRB2	SLC6A2	-0.219	0.55
GRB2	SPEF2	-0.132	0.609
GRB2	SV2A	-0.049	0.666
GRB2	SVEP1	-0.067	0.572
GRM1	UBE2N	-0.019	0.506
GRB2	ZBTB2	-0.004	0.505
GUCY1B3	NANOS3	-0.032	0.512
HACE1	PVR	-0.01	0.533
H3F3C	SLC6A2	-0.004	0.519
GTPBP4	ZNF33B	-0.001	0.503
HAND1	UBE2N	-0.028	0.533
HIF1A	LCA5	-0.004	0.543
HELT	RAB30	-0.017	0.523
HLA-DOB	PVR	-0.044	0.552
HMGN3	MIMT1	-0.016	0.508
HOMER1	MTHFD2	-0.011	0.522
HMGN3	PVR	-0.135	0.516
HNRNPA3P1	PVR	-0.077	0.506
HMGN3	STEAP2	-0.051	0.516
HSD17B4	KIAA1826	-0.039	0.506
HOXA7	LILRA2	-0.019	0.516
HS3ST2	RAB30	-0.029	0.502
HOXA7	STX7	-0.015	0.512
HVCN1	LCA5	-0.178	0.529
HVCN1	LOC100129794	-0.026	0.562
HVCN1	LRAT	-0.048	0.524
HVCN1	NCKAP1	-0.018	0.557
HVCN1	PHACTR3	-0.055	0.505
HSPB3	PVR	-0.016	0.528
HVCN1	PVR	-0.161	0.602
HYALP1	PVR	-0.077	0.528
HVCN1	SALL1	-0.04	0.549
HVCN1	SLC6A2	-0.06	0.556
HVCN1	STEAP2	-0.064	0.552
HVCN1	VSX1	-0.021	0.505
IFNGR1	LCA5	-0.117	0.568
IFNGR1	LOC400940	-0.029	0.51
IFNGR1	MIR196B	-0.056	0.518
IFNGR1	PVR	-0.058	0.57
IFNGR1	SP5	-0.057	0.531
IFNGR1	STEAP2	-0.042	0.552
IKBKAP	KIAA1826	-0.008	0.579
IKBKB	LCA5	-0.001	0.503
IL12RB2	LCA5	-0.082	0.507
ITGA1	LCA5	-0.09	0.509
ITGA1	LOC400940	-0.006	0.512
IRF4	TSHZ3	-0.004	0.501
JAK1	MORN4	-0.009	0.515
JAK1	PVR	-0.022	0.67
JAK1	STEAP2	-0.048	0.528
JTB	TSHZ3	-0.053	0.503
KCNJ3	LILRA2	-0.032	0.502
KCNK9	PEA15	-0.039	0.511
KCNMA1	PVR	-0.001	0.553
KCNK13	TMTC2	-0.001	0.502
KIAA0247	LCA5	-0.063	0.506
KIAA0247	PVR	-0.05	0.507
KDM6B	TSHZ3	-0.114	0.569
KIAA0174	ZNF33B	-0.006	0.555
KIAA1598	OAS1	-0.015	0.507
KIAA0922	PVR	-0.044	0.659
KIAA0922	STEAP2	-0.025	0.524
KIAA0319L	TSHZ3	-0.048	0.597
KIAA0528	ZNF33B	-0.039	0.516
KIAA1826	PGGT1B	-0.002	0.528
KIAA1826	PTH2	-0.026	0.533
KITLG	PYGB	-0.01	0.51
KIAA1826	RDH14	-0.016	0.579
KIAA1826	SAR1A	-0.192	0.504
KIF6	SYK	-0.035	0.538
KITLG	UBE2N	-0.045	0.526
KLHDC9	LCA5	-0.045	0.507
KLHDC8A	PVR	-0.067	0.566
KRT2	PVR	-0.017	0.534
LARP4	LCA5	-0.022	0.549
KRTAP4-5	PVR	-0.075	0.525
LCA5	LNPEP	-0.005	0.517
LCA5	LOC150776	-0.066	0.503
LCA5	LOC595101	-0.073	0.505
LCA5	LRRC56	-0.002	0.576
LCA5	MAP3K1	-0.086	0.543
LCA5	MAP6	-0.122	0.505
LCA5	MRPS27	-0.005	0.518
LCA5	MYCL1	-0.049	0.523
LCA5	NCOA3	-0.016	0.523
LCA5	NEK11	-0.006	0.542
LCA5	NFKBIZ	-0.044	0.503
LCA5	NIN	-0.045	0.53
LCA5	NIP7	-0.058	0.549
LCA5	PHTF2	-0.007	0.552
LCA5	PHYH	-0.061	0.548
LCA5	PSMC3IP	-0.011	0.523
LCA5	QRSL1	-0.077	0.527
LCA5	RAB30	-0.24	0.55
LCA5	RABL2A	-0.089	0.532
LCA5	RASSF3	-0.093	0.533
LCA5	RBBP4	-0.096	0.508
LCA5	RFC1	-0.04	0.578
LCA5	RPS13	-0.05	0.537
LCA5	RRAS2	-0.041	0.562
LCA5	SMARCA2	-0.068	0.501
LCA5	STRN3	-0.06	0.63
LCA5	TIFA	-0.08	0.516
LCA5	TMEM38B	-0.013	0.59
LCA5	TMX4	-0.106	0.514
LCA5	TNFRSF8	-0.001	0.505
LCA5	TROVE2	-0.015	0.523
LCA5	USP12	-0.045	0.523
LCA5	VAV3	-0.11	0.536
LCA5	VSIG10	-0.019	0.594
LCA5	WDR51B	-0.037	0.575
LCA5	YPEL5	-0.041	0.521
LCA5	ZNF774	-0.012	0.502
LCA5	ZNRF2	-0.017	0.509
LILRA2	LRFN5	-0.021	0.528
LILRA2	NKX2-2	-0.004	0.533
LILRA2	SLC32A1	-0.016	0.523
LILRA2	SP5	-0.083	0.506
LMBR1	MTHFD2	-0.003	0.508
LMX1A	RAB30	-0.006	0.543
LOC100271836	PVR	-0.017	0.515
LOC100286948	PVR	-0.009	0.585
LOC145783	SNORA19	-0.073	0.501
LOC400940	SLC1A2	-0.061	0.52
LRRC16A	PPP1R1A	-0.062	0.54
LRRC16A	STEAP2	-0.005	0.501
LRFN5	STX7	-0.02	0.525
LRFN5	UBE2N	-0.054	0.526
LSM6	ZNF33B	-0.192	0.512
MAL	RAB30	-0.027	0.553
LYSMD2	TSHZ3	-0.182	0.51
MACROD2	UBE2N	-0.006	0.505
MAP3K1	STEAP2	-0.019	0.527
MCM3	PVR	-0.001	0.58
MDC1	SLC6A2	-0.019	0.504
ME1	MTHFD1	-0.027	0.512
ME1	RAB30	-0.002	0.502
MFHAS1	PVR	-0.026	0.571
MIR1252	PVR	-0.092	0.515
MIR1307	PDCL3	-0.02	0.527
MIR1307	UBE2S	-0.021	0.537
MIR549	PVR	-0.039	0.55
MIR634	PVR	-0.168	0.522
MMP16	MTHFD2	-0.006	0.507
MIR941-1	PVR	-0.102	0.607
MIR941-2	PVR	-0.038	0.633
MIR941-3	PVR	-0.038	0.633
MMP16	ZNF33B	-0.004	0.54
MN1	OAS1	-0.017	0.537
MORN4	PEA15	-0.059	0.504
MORN4	PPTC7	-0.046	0.5
MN1	ST6GAL1	-0.001	0.526
MORN4	TGFBR2	-0.004	0.534
MRPL44	TSHZ3	-0.045	0.548
MSH3	PPP1R1A	-0.044	0.513
MSH3	PTPRM	-0.014	0.505
MTHFD2	ROBO1	-0.027	0.5
MTHFD2	SNX13	-0.045	0.512
MTHFD1	SVEP1	-0.009	0.509
MTHFD2	VAMP3	-0.014	0.558
MSH3	ZFP30	-0.007	0.546
MTHFD1	ZNF33B	-0.011	0.508
MYCL1	TSHZ3	-0.091	0.524
NCKAP1	OAS1	-0.07	0.502
NCKAP1	PPTC7	-0.022	0.544
NANOS3	STEAP2	-0.079	0.5
NAPG	TSHZ3	-0.053	0.501
NEUROG3	UBE2N	-0.022	0.539
NIN	PVR	-0.014	0.675
NKX2-2	STX7	-0.044	0.51
NKX2-6	STX7	-0.047	0.501
NOTCH4	PVR	-0.041	0.512
NR3C1	PVR	-0.031	0.645
NRCAM	SLC6A2	-0.014	0.531
OAS1	PPFIA2	-0.081	0.538
OAS1	PVR	-0.149	0.63
OAS1	SLC6A2	-0.114	0.551
OAS1	STEAP2	-0.124	0.531
ONECUT2	RAB30	-0.077	0.507
ONECUT2	UBE2N	-0.011	0.565
OR51B5	PVR	-0.084	0.534
OR56A4	PVR	-0.025	0.519
ORAI1	STEAP2	-0.038	0.514
PABPC4	TSHZ3	-0.039	0.504
PCDH17	RAB30	-0.023	0.519
PCDH7	RAB30	-0.03	0.529
PCDH7	UBE2N	-0.053	0.528
PCLO	UBE2N	-0.004	0.529
PDE3A	UBE2N	-0.022	0.534
PEX5L	SYK	-0.002	0.502
PI15	PVR	-0.01	0.504
PHTF2	TSHZ3	-0.08	0.534
PLA2G4A	PVR	-0.031	0.502
PLA2R1	RAB30	-0.008	0.54
PLA2G7	STX7	-0.006	0.533
PKDCC	TSHZ3	-0.089	0.525
PLCZ1	PVR	-0.022	0.5
PLEKHF2	PVR	-0.198	0.544
PLEKHF2	STEAP2	-0.132	0.517
POGK	PVR	-0.028	0.536
PMP22	TMTC2	-0.002	0.517
POMT2	TSHZ3	-0.083	0.545
PPFIA2	PPM1H	-0.004	0.552
PPM1H	PPP1R1A	-0.026	0.52
PPFIA2	PPTC7	-0.048	0.522
PPM1H	PTPRM	-0.036	0.524
PPP1R1A	RAB30	-0.042	0.542
PPP1R1A	SDPR	-0.017	0.504
PPP1R1A	TMTC2	-0.032	0.52
PPFIA2	UBE2N	-0.038	0.612
PPP1R1A	UBE2N	-0.097	0.509
PPM1H	ZFP30	-0.026	0.507
PPTC7	PVR	-0.042	0.563
PPTC7	TSHZ3	-0.228	0.529
PTPRM	RAB30	-0.031	0.555
PVR	RAB11FIP5	-0.111	0.545
PVR	RAB30	-0.012	0.679
PVR	RAG1	-0.072	0.533
PVR	RBM18	-0.027	0.534
PVR	RBM47	-0.023	0.511
PVR	RGS13	-0.156	0.5
PVR	RGS6	-0.008	0.51
PVR	RXFP1	-0.031	0.506
PVR	SCARNA3	-0.015	0.518
PVR	SCRN2	-0.064	0.574
PVR	SDPR	-0.035	0.514
PVR	SIRPG	-0.038	0.579
PVR	SKI	-0.052	0.512
PTPRM	SLC1A2	-0.014	0.531
PVR	SLC1A2	-0.023	0.571
PVR	SLC41A2	-0.066	0.578
PVR	SLC6A16	-0.031	0.577
PVR	SLCO3A1	-0.011	0.584
PTPRM	STIM2	-0.029	0.5
PVR	ST6GAL1	-0.245	0.569
PVR	SYK	-0.078	0.509
PVR	SYNM	-0.011	0.553
PVR	TAL2	-0.112	0.59
PVR	TGFBR2	-0.09	0.555
PVR	TIMD4	-0.085	0.555
PVR	TM4SF4	-0.009	0.548
PVR	TMEM71	-0.11	0.528
PVR	TNFRSF10A	-0.015	0.565
PVR	TTPAL	-0.005	0.503
PVR	TTR	-0.007	0.529
PTPRM	UBE2N	-0.007	0.605
PVR	UBE2N	-0.068	0.618
RAB30	RPL26L1	-0.015	0.505
RAB30	SCN3B	-0.024	0.557
QRSL1	STEAP2	-0.011	0.525
RAB30	STEAP2	-0.079	0.569
QRFPR	TMTC2	-0.024	0.513
QRSL1	TSHZ3	-0.158	0.62
RAB30	VWC2	-0.009	0.522
RAB30	WNT5A	-0.007	0.511
ROBO2	SYK	-0.032	0.529
RPSAP9	ZNF799	-0.024	0.528
RPSAP9	ZNHIT3	-0.009	0.501
RSPO2	SDCBP2	-0.006	0.521
RSPO2	STX7	-0.003	0.533
RTN4IP1	TSHZ3	-0.026	0.571
RSPO2	UBE2N	-0.057	0.523
SALL1	STX7	-0.029	0.501
SALL1	UBE2N	-0.084	0.541
SATB2	UCKL1AS	-0.014	0.545
SHOC2	TSHZ3	-0.058	0.501
SIDT2	TSHZ3	-0.036	0.548
SIGLEC6	TSHZ3	-0.081	0.514
SLC1A2	SPEF2	-0.071	0.528
SLC1A2	STEAP2	-0.074	0.556
SLC1A2	ZSCAN21	-0.014	0.506
SLC6A2	STIM2	-0.012	0.511
SLC6A2	TGFBR2	-0.012	0.504
SLC6A2	TMTC2	-0.008	0.55
SLC6A2	UBE2N	-0.003	0.526
SP5	TICAM2	-0.056	0.507
SP5	TMED7-TICAM2	-0.008	0.518
SPEF2	UBE2N	-0.011	0.571
SPEF2	ZC3H7A	-0.052	0.52
SSH2	TSHZ3	-0.099	0.548
STEAP2	STIM2	-0.017	0.561
ST6GAL1	SV2A	-0.051	0.515
STEAP2	TMTC2	-0.045	0.517
STEAP2	UBE2N	-0.126	0.534
STRN3	TSHZ3	-0.114	0.592
STX7	ZDBF2	-0.032	0.517
SV2A	UBE2N	-0.032	0.536
SV2A	ZNF860	-0.028	0.541
TRIM5	ZNF33B	-0.008	0.536
TRPC1	TSHZ3	-0.024	0.512
TSHZ3	ZNF446	-0.064	0.511
TSHZ3	ZNF627	-0.022	0.526
TSHZ3	ZNF860	-0.059	0.522
UBAP1	ZNF33B	-0.004	0.5
VAV3	ZBTB6	-0.01	0.528
WDR34	ZNF33B	-0.038	0.518
ZNF33B	ZNF804B	-0.018	0.514
C15orf50	TICAM2	0.095	-0.505
C15orf50	YPEL5	0.061	-0.503
AIMP2	ZNF33B	0.156	0.761
AKTIP	ZNF33B	0.159	0.777
ARL6IP1	ZNF33B	0.195	0.781
BRP44L	ZNF33B	0.222	0.781
BUB1	ZNF33B	0.228	0.792
C12orf48	ZNF33B	0.207	0.758
C17orf81	ZNF33B	0.192	0.759
C1orf27	ZNF33B	0.189	0.787
CCDC34	ZNF33B	0.24	0.78
CCRN4L	ZNF33B	0.181	0.785
CDKN2AIPNL	ZNF33B	0.168	0.768
DDX20	ZNF33B	0.223	0.774
DEPDC4	ZNF33B	0.223	0.769
DKFZp779M0652	ETV1	0.233	0.758
FADS1	ZNF33B	0.228	0.803
IL15	ZNF33B	0.127	0.752
KATNAL1	ZNF33B	0.208	0.766
KIAA1826	MAPKAPK5	0.245	0.773
LYRM2	ZNF33B	0.239	0.788
MAGOHB	ZNF33B	0.238	0.808
MAP4K5	ZNF33B	0.204	0.751
MAPKAPK5	ZNF33B	0.201	0.762
MFSD8	ZNF33B	0.17	0.752
MYBL1	ZNF33B	0.159	0.769
PALB2	ZNF33B	0.188	0.761
PDCD6IP	ZNF33B	0.199	0.766
PDE6D	ZNF33B	0.16	0.766
PEX26	ZNF33B	0.196	0.766
PEX3	ZNF33B	0.189	0.783
PHTF2	ZNF33B	0.13	0.811
POLR3G	ZNF33B	0.202	0.776
PPME1	ZNF33B	0.238	0.773
QRSL1	ZNF33B	0.171	0.781
RARS2	ZNF33B	0.111	0.767
SFRS6	ZNF33B	0.163	0.765
SMC3	ZNF33B	0.186	0.752
ST13	ZNF33B	0.205	0.799
ST7L	ZNF33B	0.196	0.76
TBCA	ZNF33B	0.184	0.757
TDRD3	ZNF33B	0.211	0.767
THAP5	ZNF33B	0.23	0.751
TMEM14A	ZNF33B	0.234	0.771
TOR1AIP1	ZNF33B	0.214	0.753
UBE2D3	ZNF33B	0.203	0.757
VPS26B	ZNF33B	0.191	0.752
ZEB1	ZNF33B	0.177	0.758
ZFYVE16	ZNF33B	0.203	0.764
ZNF33B	ZNF429	0.191	0.759
ZNF33B	ZNF622	0.214	0.797
ZNF33B	ZNF639	0.214	0.755
BATF3	PLGLA	0.265	-0.298
C12orf77	IL10	0.276	-0.262
C12orf77	TICAM2	0.262	-0.279
C15orf50	DEK	0.406	-0.257
C15orf50	IFNGR1	0.255	-0.288
C15orf50	LILRA2	0.25	-0.254
C15orf50	UBE2N	0.359	-0.265
CD72	LOC91450	0.256	-0.257
CDH29	DEK	0.303	-0.29
CDK20	LRRIQ1	0.274	-0.357
CDK20	TSPAN19	0.307	-0.322
DEK	DNAJB8	0.292	-0.285
DEK	HBZ	0.329	-0.28
DEK	KRT73	0.426	-0.283
DEK	MIR339	0.391	-0.262
DEK	MSGN1	0.424	-0.258
DERL3	NME2P1	0.273	-0.264
DEK	NRN1L	0.272	-0.309
DEK	ZSCAN10	0.285	-0.267
FYTTD1	MIR922	0.307	-0.261
FXYD3	TMTC2	0.253	-0.262
IFT57	KRT73	0.256	-0.267
IFT57	MSGN1	0.258	-0.252
KRT73	UBE2N	0.316	-0.301
LOC100271836	MIR339	0.289	-0.256
LOC100271836	MSGN1	0.255	-0.258
LOC115110	RAB30	0.252	-0.269
MBD1	SGOL1	0.279	-0.275
MIR567	MIR922	0.294	-0.275
PLGLA	SLC35E1	0.267	-0.268
C12orf77	C15orf57	0.541	-0.063
C12orf77	SCAMP2	0.508	-0.007
C15orf50	GRB2	0.55	-0.026
C15orf50	MIR624	0.523	-0.064
C21orf67	KRT73	0.551	-0.006
CDK20	MIPOL1	0.533	-0.029
CENPM	KRT73	0.514	-0.007
DEK	GNB3	0.503	-0.014
GGT6	TMEM129	0.521	-0.05
KRT73	MIR624	0.524	-0.01
MIR339	MIR624	0.578	-0.003
