# Supplementary material for: A Comparison of Co-methylation Relationships Between Rheumatoid Arthritis and Parkinson's Disease
Source: Front Neurosci. 2019 Jan 10;12:1001. doi: 10.3389/fnins.2018.01001 (PMC6335329; doi:10.3389/fnins.2018.01001)
Supplement: Supplementary File S2 — 196,311 gene pairs crossing no less than three intervals with large changes of the co-methylation relationship from PD controls to cases. [file Table_2.XLSX]

## Sheet: Sheet1
gene1	gene2	PD_contol_corr	PD_case_corr
AMY2A	CCT5	-0.54	0.085
AMY2A	FAM173B	-0.548	0.083
APOL5	ATP11B	-0.255	0.308
ARL8A	CCNE2	-0.259	0.298
CDH19	EHHADH	-0.263	0.288
HN1L	LOC645676	-0.345	0.267
LOC100132247	RHOQ	-0.332	0.252
LIN37	TXN2	-0.305	0.651
C12orf77	FLJ45983	-0.029	-0.756
CYSLTR2	LOC439994	-0.009	-0.776
FAM72B	PRPS1L1	-0.174	-0.762
FAM72B	SUMO4	-0.209	-0.751
FLJ45983	PECAM1	-0.091	-0.771
HMX3	PECAM1	-0.184	-0.751
HSPB11	MIR548K	-0.152	-0.769
HSPB11	SNORA2B	-0.16	-0.759
REL	SNORA2B	-0.107	-0.753
AMBN	GOLGA6C	-0.064	0.52
APLF	SEPT11	-0.088	0.528
ARHGAP5	LOC729375	-0.012	0.591
ARHGAP5	SEPT11	-0.092	0.653
BBS12	SEPT11	-0.016	0.59
BBS12	ZNF554	-0.019	0.543
BLK	LOC100132247	-0.013	0.514
C14orf128	SEPT11	-0.061	0.699
C19orf43	HN1L	-0.06	0.625
C20orf194	SEPT11	-0.068	0.585
CADM4	SEPT11	-0.016	0.531
DTD1	SEPT11	-0.037	0.607
EIF5A	INTS4L2	-0.034	0.502
FAM20B	SEPT11	-0.006	0.552
FDXR	SEPT11	-0.017	0.707
GOLGA6C	ISPD	-0.006	0.511
GOLGA6C	LAPTM4B	-0.018	0.514
GOLGA6C	PHF3	-0.055	0.543
HIST1H4K	UBE2C	-0.008	0.716
LOC728190	MARCH11	-0.002	0.543
LOC728190	SEPT11	-0.004	0.634
LOC729338	ZNF554	-0.04	0.556
MAP3K2	PTPN1	-0.018	0.505
MIR1296	OR13F1	-0.018	0.568
MIR488	PIGC	-0.001	0.503
MREG	SNORD115-7	-0.054	0.521
PSG5	RGS11	-0.046	0.567
PRR24	SEPT11	-0.052	0.696
RANBP10	SEPT11	-0.001	0.505
RG9MTD2	SEPT11	-0.004	0.557
SEPT11	STX6	-0.029	0.562
SEPT11	TOP3B	-0.007	0.563
SEPT11	ZNF780B	-0.057	0.585
CYSLTR2	FAM72B	0.132	-0.815
CYSLTR2	NCRNA00115	0.113	-0.76
CYSLTR2	REL	0.018	-0.759
CYSLTR2	RRP8	0.168	-0.769
FAM72B	SNORA40	0.015	-0.776
RRP8	SNORA40	0.018	-0.773
ABCB5	FAM72B	0.087	-0.501
A1CF	HMX3	0.044	-0.519
ABCA10	HSPB11	0.05	-0.503
A2M	MIR1908	0.127	-0.504
ABCB5	MIR636	0.101	-0.502
ABCB5	REL	0.002	-0.505
ABCF3	SEPT11	0.031	-0.53
ACRC	FAM72B	0.033	-0.536
ACSBG1	FLJ45983	0.046	-0.555
ACSM5	FLJ45983	0.009	-0.537
ACRC	LOC439994	0.023	-0.503
ACRC	SEPT11	0.018	-0.501
ADAM21P1	CASP9	0.021	-0.514
ADAM21P1	LOC100329108	0.077	-0.511
ADRBK2	AMBN	0.212	-0.522
AFG3L2	AMY2B	0.249	-0.505
ADH6	APIP	0.022	-0.527
AFP	APIP	0.124	-0.501
ADRBK2	BEND2	0.013	-0.532
AFG3L2	BEND2	0.158	-0.508
ADRBK2	C12orf63	0.134	-0.541
ADRBK2	C5	0.05	-0.551
ADRBK2	C5orf47	0.09	-0.53
AFG3L2	C5orf47	0.14	-0.531
ADI1	CASP9	0.026	-0.503
ADH6	CCDC82	0.124	-0.532
AFP	CCDC82	0.025	-0.529
AFP	ELP2P	0.021	-0.545
ADRBK2	FAM151A	0.083	-0.529
ADRBK2	FAM170A	0.025	-0.507
ADH6	FAM72B	0.06	-0.57
AFP	FAM72B	0.03	-0.578
AFP	FDXR	0.033	-0.501
ADORA2A	FLJ45983	0.068	-0.516
ADRBK2	FOXI1	0.157	-0.541
ADH6	GGNBP2	0.032	-0.564
ADIPOQ	GGNBP2	0.023	-0.512
ADRBK2	GRPR	0.147	-0.505
ADRBK2	HAO1	0.066	-0.54
ADORA2A	HMX3	0.086	-0.546
ADH6	JRKL	0.137	-0.532
AFP	JRKL	0.059	-0.52
ADRBK2	LOC100130264	0.004	-0.515
AFG3L2	LOC100329109	0.016	-0.511
AFP	LOC220930	0.045	-0.515
AFG3L2	LOC340017	0.175	-0.553
ADH6	LOC439994	0.001	-0.532
AFG3L2	LOC648740	0.231	-0.502
ADH6	LRRC42	0.014	-0.522
ADRBK2	MIR133B	0.079	-0.529
ADRBK2	MIR181B1	0.141	-0.532
ADRBK2	MIR548K	0.102	-0.523
AFG3L2	MIR548A1	0.042	-0.504
AFG3L2	MIR548K	0.101	-0.576
AFG3L2	MIR573	0.018	-0.551
AFP	MIR638	0.06	-0.516
ADH6	MKI67IP	0.05	-0.502
AFP	MKI67IP	0.046	-0.51
ADRBK2	MMP26	0.122	-0.554
AFG3L2	MRS2P2	0.15	-0.527
ADRBK2	MS4A5	0.13	-0.536
ADRBK2	MYLPF	0.08	-0.513
ADH6	NCRNA00115	0.086	-0.509
ADRBK2	OR13F1	0.092	-0.522
ADRBK2	OR2T8	0.13	-0.511
ADRBK2	OR52A5	0.055	-0.53
ADRBK2	OR52H1	0.098	-0.505
AFG3L2	OR52H1	0.144	-0.574
ADH6	REL	0.005	-0.566
ADRBK2	REG1A	0.055	-0.59
ADH6	RRP8	0.094	-0.509
AFP	RRP8	0.1	-0.524
ADRBK2	SIRPD	0.05	-0.569
ADRBK2	SNORA2B	0.066	-0.565
AFG3L2	SNORA16B	0.112	-0.523
AFG3L2	SNORA2B	0.059	-0.528
ADRBK2	SNORD11	0.109	-0.508
ADRBK2	SPINK5L3	0.033	-0.502
ADRBK2	STH	0.04	-0.564
AFG3L2	STH	0.139	-0.512
ADRBK2	TIGD7	0.161	-0.545
AFG3L2	TIGD7	0.105	-0.529
ADH6	TTC21A	0.01	-0.501
AKAP3	CCDC82	0.164	-0.507
AKAP3	ELP2P	0.041	-0.52
AGR2	FAM72B	0.126	-0.503
AKAP3	FAM72B	0.069	-0.544
AGR3	GGNBP2	0.024	-0.524
AGR3	HSPB11	0.088	-0.502
AKAP3	JRKL	0.189	-0.502
AGR3	LOC439994	0.106	-0.511
AGR2	PRR24	0.092	-0.501
AGR2	REL	0.053	-0.509
AGR3	REL	0.105	-0.504
AKAP3	RRP8	0.093	-0.507
AKAP3	SEPT11	0.037	-0.506
AHSA1	SNORA2B	0.121	-0.508
AHSA1	TIGD7	0.122	-0.505
AK3	TIGD7	0.07	-0.521
AMBN	ARHGAP5	0.109	-0.539
AMBN	ARPC5L	0.016	-0.559
AMBN	C18orf22	0.078	-0.537
AMBN	C1orf93	0.231	-0.516
ALCAM	CASP9	0.137	-0.507
AMBN	CASP9	0.006	-0.683
AMBN	CCDC82	0.233	-0.567
AMBN	CMTM3	0.055	-0.577
AMBN	EIF5A	0.214	-0.615
AMBN	ELP2P	0.139	-0.638
ALB	FAM72B	0.004	-0.504
AMBN	FAM72B	0.225	-0.603
AMBN	FBXO48	0.175	-0.53
AMBN	FDXR	0.115	-0.537
AMBN	GGNBP2	0.122	-0.598
AMBN	GORASP1	0.163	-0.524
AMBN	HES4	0.123	-0.508
AMBN	HSPB11	0.012	-0.696
AMBN	IGSF8	0.067	-0.584
AMBN	LOC220930	0.23	-0.53
AMBN	LOC439994	0.048	-0.637
AMBN	LOC729338	0.059	-0.528
AMBN	LRRC42	0.072	-0.645
ALCAM	MARCH11	0.044	-0.504
AMBN	MARCH11	0.062	-0.577
AMBN	MIR484	0.122	-0.55
AMBN	MKI67IP	0.097	-0.599
AMBN	NCRNA00115	0.166	-0.529
ALG3	OR52A5	0.133	-0.512
ALG3	OR8U1	0.141	-0.512
AMBN	PPP4R1L	0.043	-0.506
ALG3	PRPS1L1	0.135	-0.547
AMBN	PRR24	0.034	-0.648
AMBN	PVRL2	0.243	-0.54
AMBN	REL	0.093	-0.655
AMBN	RRP8	0.229	-0.544
AMBN	SEH1L	0.212	-0.594
AMBN	SEPT11	0.122	-0.501
ALG3	SNORA2B	0.209	-0.549
ALG3	SNORA40	0.062	-0.621
AMBN	SNORD12C	0.14	-0.528
ALG3	SUMO4	0.134	-0.511
AMBN	SVIP	0.196	-0.576
AMBN	TOX4	0.147	-0.51
AMBN	TTC21A	0.146	-0.536
AMBN	ZNF780B	0.068	-0.608
AMPD1	APIP	0.098	-0.532
AMY2B	C14orf128	0.138	-0.561
AMY2B	C18orf22	0.171	-0.517
AMY2B	CASP9	0.023	-0.61
AMPD1	CCDC82	0.164	-0.567
ANGPTL7	CCDC82	0.202	-0.547
AMY2B	CMTM3	0.129	-0.515
AMY2B	CSTB	0.225	-0.521
AMPD1	EIF5A	0.042	-0.512
AMY2B	EIF5A	0.237	-0.595
AMY2B	ELP2P	0.116	-0.653
ANGPTL7	ELP2P	0.035	-0.553
AMPD1	FAM72B	0.073	-0.599
AMY2B	FAM72B	0.141	-0.684
ANGPTL7	FAM72B	0.049	-0.633
AMY2B	FBXL12	0.031	-0.625
ANGPTL7	FBXL12	0.069	-0.517
ANGPTL7	FDXR	0.202	-0.509
AMPD1	GGNBP2	0.007	-0.565
AMY2B	GCSH	0.128	-0.533
AMPD1	HES4	0.011	-0.526
AMY2B	HES4	0.001	-0.505
AMY2B	IGSF8	0.1	-0.544
AMPD1	JRKL	0.176	-0.566
ANGPTL7	JRKL	0.194	-0.537
AMY2B	LASS5	0.018	-0.556
AMY2B	LOC100128822	0.247	-0.564
AMY2B	LOC100329108	0.063	-0.613
ANGPTL1	LOC100329108	0.041	-0.504
ANGPTL7	LOC100289511	0.194	-0.509
AMY2B	LOC143666	0.198	-0.563
AMY2B	LOC154761	0.128	-0.605
AMY2B	LOC220930	0.187	-0.574
AMY2B	LOC284900	0.111	-0.504
AMY2B	LOC439994	0.021	-0.63
AMY2B	LOC729338	0.005	-0.541
ANGPTL7	LOC729338	0.05	-0.555
AMY2B	LRRC42	0.063	-0.612
AMY2B	ME2	0.233	-0.545
AMY2B	MIR636	0.016	-0.518
AMPD1	MKI67IP	0.075	-0.503
AMY2B	MKI67IP	0.21	-0.562
AMY2B	NCRNA00115	0.166	-0.585
ANGPTL7	NCRNA00115	0.063	-0.541
AMY2B	OBFC1	0.178	-0.534
AMPD1	PEX11A	0.106	-0.517
AMY2B	PPP3CC	0.222	-0.578
ANGPTL7	PPP3CC	0.093	-0.518
AMY2B	PRR24	0.058	-0.614
ANGPTL7	PRR24	0.003	-0.533
AMY2B	PSMG1	0.19	-0.524
AMY2B	REL	0.072	-0.677
ANGPTL7	REL	0.015	-0.58
AMPD1	RRP8	0.096	-0.552
AMY2B	RRP8	0.181	-0.635
ANGPTL7	RRP8	0.076	-0.563
AMY2B	SEH1L	0.184	-0.589
AMPD1	SEPT11	0.153	-0.541
AMY2B	SNORD12C	0.044	-0.567
AMPD1	SVIP	0.033	-0.532
AMY2B	SVIP	0.134	-0.598
ANGPTL7	SVIP	0.09	-0.528
AMY2B	TMEM141	0.189	-0.522
AMY2B	WASH5P	0.214	-0.531
AMPD1	ZNF768	0.112	-0.517
AMY2B	ZNF780B	0.21	-0.563
ANGPTL7	ZNF780B	0.087	-0.503
AP4B1	CLDN20	0.045	-0.507
AP4B1	COL10A1	0.031	-0.512
AOX2P	FLJ45983	0.013	-0.506
AP3M2	MARCH11	0.09	-0.502
AP4B1	MIR181B1	0.111	-0.506
AP4B1	MIR548K	0.064	-0.528
AP4B1	SNORA2B	0.026	-0.503
AP4B1	TIGD7	0.083	-0.519
APIP	ASB5	0.165	-0.535
APOC4	ASCL1	0.002	-0.549
APIP	BEND2	0.12	-0.501
APIP	C12orf63	0.154	-0.507
APIP	C17orf50	0.102	-0.503
APIP	C5	0.032	-0.512
APOBEC3C	CASP9	0.116	-0.518
APPL2	CASP9	0.114	-0.516
APIP	CLDN20	0.166	-0.621
APLF	CLDN20	0.044	-0.533
APIP	CYSLTR2	0.24	-0.686
APLF	CYSLTR2	0.114	-0.526
ARFGEF2	CYSLTR2	0.181	-0.548
APIP	DEFB108B	0.135	-0.55
APIP	DISC2	0.155	-0.567
APOC4	EMX2	0.005	-0.522
APOD	ELP2P	0.059	-0.508
APIP	FAM151A	0.163	-0.512
APIP	FAM170A	0.144	-0.567
APOBEC2	FAM72B	0.182	-0.51
APIP	FOXI1	0.214	-0.608
APOBEC3C	FXYD5	0.121	-0.52
APOD	GGNBP2	0.034	-0.503
APIP	HAO1	0.113	-0.545
APOC4	HAND2	0.051	-0.504
APOD	HES4	0.018	-0.552
APOBEC3C	HSPB11	0.084	-0.525
APOC4	INTU	0.02	-0.529
APOC4	IRX3	0.033	-0.522
APIP	KCNJ13	0.038	-0.511
APIP	KRBA2	0.109	-0.506
APOBEC3C	LOC100329108	0.2	-0.519
APIP	LOC442308	0.0	-0.584
APOBEC2	LOC439994	0.102	-0.504
APIP	MIR1296	0.038	-0.51
APIP	MIR181A2	0.158	-0.585
APIP	MIR181B1	0.19	-0.566
APIP	MIR181B2	0.158	-0.585
APIP	MIR1913	0.081	-0.606
APOC4	MIR1908	0.168	-0.513
APOD	MIR1908	0.191	-0.532
AQP6	MIR1908	0.101	-0.528
APIP	MIR548K	0.175	-0.533
APIP	MIRLET7A2	0.033	-0.553
APIP	MS4A5	0.176	-0.567
APIP	NACA2	0.188	-0.512
APOC4	NKX2-2	-0.0	-0.566
APOC4	NKX3-2	0.033	-0.508
APIP	OR13F1	0.106	-0.579
APOC4	ONECUT1	0.084	-0.502
APOC4	ONECUT2	0.127	-0.514
APH1B	OR52A5	0.055	-0.521
APIP	OR52A5	0.12	-0.683
APIP	OR5AK2	0.068	-0.513
APLF	OR52A5	0.03	-0.513
ARFGEF2	OR52A5	0.135	-0.546
APIP	OR8U1	0.153	-0.559
APIP	PHF3	0.248	-0.563
APOC4	POU3F2	0.002	-0.539
APIP	PRO1768	0.181	-0.543
APIP	PRPS1L1	0.08	-0.662
APLF	PRPS1L1	0.036	-0.521
APOD	PRR24	0.033	-0.511
APOC4	RASSF10	0.053	-0.53
APIP	REG1A	0.103	-0.588
APOBEC2	REL	0.077	-0.516
APOD	REL	0.038	-0.522
APOBEC2	RRP8	0.233	-0.501
APIP	SCARNA23	0.141	-0.54
APOBEC3C	SERAC1	0.026	-0.51
APIP	SIRPD	0.098	-0.526
APIP	SLC24A1	0.188	-0.509
APH1B	SNORA2B	0.081	-0.513
APIP	SNORA2B	0.11	-0.633
APLF	SNORA2B	0.138	-0.501
APIP	SNORA42	0.214	-0.52
APLF	SNORA40	0.14	-0.52
APIP	SNORD88B	0.18	-0.571
APIP	SNORD91A	0.208	-0.519
APOC4	SP9	0.047	-0.533
AQP6	SP9	0.012	-0.519
APIP	ST7OT3	0.126	-0.527
APIP	STH	0.115	-0.586
APIP	SUMO4	0.073	-0.6
APIP	TAS2R5	0.182	-0.505
APH1B	TIGD7	0.139	-0.534
APIP	TIGD7	0.139	-0.648
APLF	TIGD7	0.069	-0.55
APIP	TMED10P	0.167	-0.524
APIP	TMEM14E	0.139	-0.542
APIP	TMEM30C	0.198	-0.511
APIP	TMPRSS11D	0.018	-0.541
APOC4	VAX1	0.009	-0.577
APIP	ZFP14	0.141	-0.544
APOC4	ZDBF2	0.187	-0.516
AQP6	ZDBF2	0.114	-0.503
APIP	ZG16	0.176	-0.507
ARHGAP5	C5orf47	0.055	-0.524
ARHGAP5	CLDN20	0.031	-0.574
ARHGAP5	CYSLTR2	0.017	-0.619
ARMS2	FAM72B	0.044	-0.531
ARID5B	FLJ45983	0.228	-0.52
ARL14	FLJ45983	0.008	-0.526
ARHGAP17	HMX3	0.241	-0.615
ARID5B	HMX3	0.108	-0.522
ARHGAP5	KRTAP4-8	0.01	-0.535
ARHGAP5	LOC283174	0.012	-0.512
ARHGAP5	LOC442308	0.115	-0.553
ARMS2	LOC439994	0.081	-0.505
ARHGAP5	MIR181B1	0.147	-0.577
ARHGAP17	MIR196B	0.148	-0.513
ARHGAP5	MIR548A1	0.021	-0.509
ARHGAP5	MIR548K	0.031	-0.56
ARHGAP5	OR13F1	0.047	-0.52
ARHGAP5	OR52H1	0.128	-0.506
ARHGAP5	PRO1768	0.02	-0.516
ARHGAP5	PRPS1L1	0.033	-0.553
ARHGAP5	STH	0.056	-0.561
ARHGAP5	TIGD7	0.1	-0.629
ASCL1	BLK	0.247	-0.501
ARPC5L	BNIPL	0.004	-0.512
ARPC5L	C12orf63	0.054	-0.538
ASB17	C11orf35	0.119	-0.512
ASCL1	C12orf74	0.156	-0.536
ASB5	C18orf54	0.025	-0.507
ASB17	C20orf194	0.028	-0.519
ASCL1	C21orf71	0.076	-0.529
ASB14	CASP9	0.008	-0.508
ASB17	CASP9	0.031	-0.524
ASCL3	CASP9	0.089	-0.504
ASB14	CCDC82	0.248	-0.56
ASB17	CCDC59	0.018	-0.506
ASB17	CCDC82	0.083	-0.626
ASB5	CCDC82	0.171	-0.593
ASPN	CCDC82	0.177	-0.532
ARPC5L	CEACAM20	0.023	-0.565
ASB17	EIF5A	0.047	-0.541
ASB5	EIF4ENIF1	0.249	-0.506
ASB5	EIF5A	0.129	-0.575
ASB11	ELP2P	0.006	-0.537
ASB14	ELP2P	0.073	-0.557
ASCL3	ELP2P	0.057	-0.501
ASPN	ELP2P	0.067	-0.519
ASB17	EPO	0.053	-0.506
ASB11	FAM72B	0.129	-0.522
ASB14	FAM72B	0.112	-0.618
ASB5	FAM72B	0.062	-0.642
ASCL3	FAM72B	0.173	-0.516
ASPN	FAM72B	0.042	-0.52
ASB14	FBXL12	0.027	-0.524
ASB17	FBXL12	0.068	-0.538
ASB5	FBXO48	0.061	-0.514
ASB14	FDXR	0.087	-0.519
ASB17	FDXR	0.079	-0.512
ASB5	FDXR	0.056	-0.602
ASB5	FLJ39582	0.064	-0.529
ARPC5L	FOXI1	0.079	-0.515
ASCL1	FSD2	0.003	-0.514
ASB11	GGNBP2	0.049	-0.566
ASB17	GEMIN4	0.108	-0.53
ASCL3	GGNBP2	0.038	-0.519
ASB11	HES4	0.126	-0.519
ASCL1	IL4	0.002	-0.525
ASB17	JRKL	0.058	-0.624
ASB5	JRKL	0.193	-0.582
ASPN	JRKL	0.197	-0.524
ASCL1	LILRB4	0.087	-0.564
ASB11	LOC100329108	0.096	-0.535
ASB14	LOC100329108	0.116	-0.503
ASB17	LOC100216545	0.027	-0.551
ASB5	LOC100216545	0.155	-0.513
ASB5	LOC100329108	0.07	-0.522
ASB11	LOC143666	0.178	-0.51
ASB11	LOC220930	0.216	-0.504
ASB14	LOC154761	0.169	-0.508
ASB14	LOC220930	0.171	-0.508
ASB17	LOC143666	0.105	-0.502
ASB5	LOC154761	0.108	-0.501
ASB5	LOC220930	0.121	-0.52
ASCL3	LOC439994	0.075	-0.534
ASB14	LRRC42	0.073	-0.548
ASB17	LRRC42	0.015	-0.564
ASB11	MARCH11	0.031	-0.503
ARPC5L	MIR103-2	0.062	-0.503
ARPC5L	MIR324	0.026	-0.501
ASB11	MIR636	0.078	-0.517
ASB14	MIR638	0.162	-0.509
ASCL1	MIR634	0.011	-0.531
ASB14	MKI67IP	0.145	-0.531
ASB17	MKI67IP	0.067	-0.503
ASB5	MKI67IP	0.09	-0.56
ASCL1	MIR922	0.214	-0.516
ASCL1	MIR941-1	0.194	-0.527
ARPC5L	MRS2P2	0.099	-0.508
ARPC5L	MS4A5	0.087	-0.519
ASCL1	MSGN1	0.001	-0.555
ARPC5L	NACA2	0.027	-0.561
ASB14	NCRNA00115	0.024	-0.543
ASB5	NCRNA00115	0.017	-0.589
ASPN	NCRNA00115	0.022	-0.525
ASB17	NDUFS3	0.179	-0.504
ASB5	NDUFB3	0.175	-0.519
ASB17	NQO2	0.049	-0.54
ASPN	NPBWR1	0.099	-0.501
ASB17	OBFC1	0.031	-0.506
ARPC5L	OR52H1	0.086	-0.505
ASCL1	PDCD1	0.018	-0.526
ASB17	PDHX	0.023	-0.543
ASB17	PEX11A	0.035	-0.566
ASB5	PEX11A	0.183	-0.557
ASCL1	PPBP	0.024	-0.52
ASB14	PPP3CC	0.225	-0.516
ASB5	PPP3CC	0.207	-0.511
ASB17	PRR24	0.036	-0.58
ASB5	PSMG1	0.17	-0.535
ASCL1	PTCRA	0.031	-0.515
ASB17	PVRL2	0.061	-0.507
ASB17	RASSF7	0.182	-0.51
ASB11	REL	0.004	-0.521
ASB17	REL	0.047	-0.61
ASCL3	REL	0.036	-0.526
ASPN	REL	0.03	-0.535
ASB17	RPGRIP1L	0.165	-0.55
ASB5	RPGRIP1L	0.208	-0.534
ASB14	RRP8	0.167	-0.573
ASB17	RRP8	0.014	-0.53
ASB5	RRP8	0.115	-0.63
ASPN	RRP8	0.095	-0.505
ASB14	SEH1L	0.114	-0.513
ASB5	SEH1L	0.053	-0.511
ASB14	SEPT11	0.04	-0.552
ASCL1	SFTPB	0.003	-0.565
ASCL1	SLC6A16	0.069	-0.53
ARPC5L	SNORA2B	0.008	-0.59
ARPC5L	SNORD119	0.005	-0.537
ASB11	SNORD12C	0.121	-0.504
ASB14	SNORD12C	0.044	-0.517
ASCL1	SNORD21	0.031	-0.515
ASCL1	SNORD4B	0.037	-0.53
ASCL1	SUNC1	0.011	-0.506
ASB14	SVIP	0.1	-0.56
ASB5	SVIP	0.132	-0.602
ASB17	TADA2A	0.075	-0.512
ASB5	TOX4	0.033	-0.503
ASB11	WASH5P	0.119	-0.52
ARPC5L	WDR64	0.139	-0.51
ASB5	ZNF768	0.116	-0.507
ASB14	ZNF780B	0.081	-0.518
ASB17	ZNF780B	0.024	-0.546
ASB5	ZNF780B	0.07	-0.559
ATL2	CASP9	0.03	-0.512
ATL2	ELP2P	0.132	-0.517
ATL2	FBXL12	0.038	-0.504
ATP2B1	HSPB11	0.026	-0.521
ATP13A3	LOC100329108	0.038	-0.523
ATL2	REL	0.054	-0.522
ATP6V1C2	CMTM3	0.001	-0.506
ATP6V1C2	EIF4ENIF1	0.201	-0.509
ATP6V1C2	EIF5A	0.129	-0.573
ATP6V1C2	ELP2P	0.14	-0.533
ATP6V1C2	FAM72B	0.051	-0.571
ATP6V1G3	FLJ45983	0.135	-0.623
ATP6V1C2	GCSH	0.183	-0.524
ATP6V1G3	HES4	0.069	-0.531
ATP6V1G3	HIST1H3D	0.137	-0.507
ATP6V1G3	HIST1H4E	0.064	-0.52
ATP6V1G3	HIST3H2A	0.221	-0.546
ATP6V1G3	HIST3H2BB	0.218	-0.524
ATP6V1G3	HMX3	0.127	-0.628
ATXN1	HMX3	0.111	-0.532
ATP6V1C2	LOC100329108	0.136	-0.567
ATP6V1C2	LOC143666	0.159	-0.501
ATP6V1C2	LOC154761	0.166	-0.569
ATP6V1C2	ME2	0.085	-0.504
ATP6V1G3	MIR129-2	0.022	-0.581
ATP6V1G3	MIR1908	0.147	-0.557
ATP6V1C2	MKI67IP	0.13	-0.543
ATP6V1G3	MYADM	0.231	-0.554
ATP6V1C2	PPP3CC	0.126	-0.511
ATP6V1C2	PVRL2	0.169	-0.503
ATP6V1G3	RAD21L1	0.069	-0.519
ATP6V1C2	RRP8	0.14	-0.511
ATP6V1C2	SEH1L	0.159	-0.521
ATP6V1C2	SEPT11	0.092	-0.503
B3GAT3	SNORA40	0.183	-0.517
ATP6V1C2	SNORD12C	0.054	-0.524
ATP6V1C2	ZNF780B	0.002	-0.559
BARHL2	C12orf77	0.001	-0.573
BBS12	C12orf69	0.001	-0.543
BBS12	CLDN20	0.005	-0.55
BARHL2	CORO1B	0.052	-0.501
BBS12	CYSLTR2	0.047	-0.57
BBS12	DISC2	0.002	-0.53
BAAT	EIF5A	0.083	-0.547
BAAT	FBXL12	0.03	-0.554
BAAT	GCSH	0.04	-0.534
BCAS4	HMX3	0.215	-0.511
BAAT	IGSF8	0.003	-0.55
BAAT	IMPA2	0.132	-0.502
BARHL2	KIF3B	0.039	-0.522
BARHL2	LILRB4	0.012	-0.569
BAAT	LOC100128822	0.056	-0.561
BAAT	LOC154761	0.008	-0.562
BAAT	LOC220930	0.001	-0.517
BBS12	LOC283174	0.012	-0.504
BAAT	LOC729338	0.031	-0.502
BAAT	LRRC42	0.001	-0.57
BARHL2	MDFIC	0.018	-0.514
BBS12	MIR103-1	0.059	-0.528
BBS12	MIR181B1	0.049	-0.55
BBS12	MIR548A1	0.023	-0.509
BBS12	MIR548K	0.033	-0.535
BARHL2	MIR634	0.007	-0.507
BAAT	MKI67IP	0.08	-0.512
BARHL2	MIR922	0.176	-0.515
BAAT	NQO2	0.092	-0.501
BBS12	OR13F1	0.05	-0.521
BBS12	OR52A5	0.001	-0.572
BAAT	PRR24	0.007	-0.56
BBS12	SNORA2B	0.052	-0.57
BBS12	SNORD119	0.133	-0.501
BBS12	STH	0.085	-0.532
BBS12	TIGD7	0.055	-0.576
BAAT	WASH5P	0.023	-0.534
BAAT	ZNF780B	0.082	-0.55
BEND2	C18orf22	0.102	-0.514
BEND2	C1orf93	0.238	-0.531
BLK	CBLN1	0.097	-0.547
BEND2	CCDC59	0.115	-0.511
BEND2	CCDC82	0.13	-0.537
BEND2	CHRAC1	0.128	-0.526
BEND2	CMTM3	0.014	-0.549
BEND2	CSTB	0.115	-0.518
BEND2	EIF4ENIF1	0.203	-0.576
BEND2	EIF5A	0.131	-0.574
BCKDK	FLJ45983	0.112	-0.506
BLK	FLJ45983	0.192	-0.693
BLK	FOXA1	0.068	-0.515
BLK	FOXQ1	0.154	-0.521
BEND2	GCSH	0.107	-0.594
BCKDK	HMX3	0.065	-0.56
BLK	HMX3	0.107	-0.684
BLNK	HMX3	0.129	-0.585
BLK	HOXA9	0.124	-0.523
BLK	HOXD8	0.077	-0.518
BEND2	HSPA1A	0.072	-0.502
BEND2	IGSF8	0.03	-0.584
BEND2	IMPA2	0.144	-0.513
BLK	IRX5	0.162	-0.534
BEND2	JRKL	0.153	-0.538
BEND2	LASS5	0.039	-0.554
BLK	LHX1	0.219	-0.533
BEND2	LOC100128822	0.121	-0.592
BEND2	LOC100329108	0.009	-0.666
BEND2	LOC143666	0.096	-0.576
BEND2	LOC154761	0.071	-0.631
BEND2	LOC220930	0.099	-0.567
BEND2	LOC284900	0.021	-0.512
BEND2	LOC439994	0.013	-0.608
BEND2	ME2	0.083	-0.562
BLK	MIR1253	0.02	-0.514
BLK	MIR196B	0.027	-0.562
BEND2	MIR638	0.084	-0.505
BEND2	MKI67IP	0.111	-0.592
BEND2	NCRNA00115	0.017	-0.539
BEND2	NDUFS3	0.211	-0.518
BLK	NKX2-1	0.031	-0.521
BEND2	NQO2	0.116	-0.511
BEND2	OBFC1	0.086	-0.508
BLK	POU3F3	0.133	-0.515
BEND2	PPP3CC	0.159	-0.577
BEND2	PVRL2	0.155	-0.541
BLK	RAB6C	0.11	-0.516
BEND2	REL	0.021	-0.656
BEND2	RRP8	0.036	-0.553
BEND2	SEH1L	0.048	-0.622
BLK	SP5	0.2	-0.521
BEND2	SVIP	0.049	-0.571
BEND2	TADA2A	0.164	-0.504
BLK	TLX3	0.11	-0.54
BEND2	TMEM141	0.029	-0.537
BLK	TRIL	0.183	-0.501
BEND2	ZNF480	0.145	-0.515
BEND2	ZNF768	0.144	-0.56
BEND2	ZNF780B	0.02	-0.596
BNIPL	C14orf128	0.097	-0.555
BNIPL	CASP9	0.071	-0.567
BNIPL	CCDC82	0.249	-0.597
BNIPL	EIF5A	0.208	-0.546
BNIPL	ELP2P	0.121	-0.635
BNIPL	FAM72B	0.086	-0.667
BNIPL	FBXL12	0.082	-0.561
BNIPL	FDXR	0.194	-0.517
BNIPL	IGSF8	0.087	-0.536
BNIPL	LASS5	0.028	-0.517
BNIPL	LOC100128822	0.224	-0.513
BNIPL	LOC100289511	0.201	-0.513
BNIPL	LOC100329108	0.101	-0.573
BNIPL	LOC143666	0.201	-0.52
BNIPL	LOC154761	0.11	-0.578
BNIPL	LOC220930	0.127	-0.548
BNIPL	LOC729338	0.061	-0.548
BNIPL	LRRC42	0.14	-0.568
BNIPL	ME2	0.235	-0.502
BNIPL	MIR638	0.168	-0.53
BNIPL	MKI67IP	0.147	-0.556
BNIPL	NCRNA00115	0.104	-0.581
BNIPL	PPP3CC	0.243	-0.565
BNIPL	PRR24	0.054	-0.606
BNIPL	PSMG1	0.22	-0.504
BNIPL	REL	0.034	-0.665
BNIPL	RRP8	0.141	-0.609
BNIPL	SEH1L	0.157	-0.555
BNIPL	SNORD12C	0.057	-0.547
BNIPL	SVIP	0.129	-0.551
BNIPL	ZNF768	0.192	-0.587
BNIPL	ZNF780B	0.181	-0.532
BZW1L1	CCDC82	0.166	-0.527
BZW1L1	EIF5A	0.056	-0.539
BZW1L1	ELP2P	0.021	-0.568
BZW1L1	FAM72B	0.066	-0.561
BZW1L1	FDXR	0.093	-0.508
BTLA	HMX3	0.066	-0.576
BZW1L1	JRKL	0.173	-0.518
BZW1L1	LOC100329108	0.049	-0.55
BZW1L1	LOC154761	0.052	-0.528
BTLA	MIR196B	0.076	-0.501
BZW1L1	NCRNA00115	0.061	-0.51
BZW1L1	RRP8	0.113	-0.53
BZW1L1	SVIP	0.108	-0.552
BZW1L1	ZNF780B	0.087	-0.522
C12orf26	C5orf47	0.205	-0.517
C10orf99	CBLN1	0.098	-0.51
C12orf26	CLDN20	0.117	-0.538
C12orf26	CYSLTR2	0.16	-0.565
C12orf26	DISC2	0.219	-0.537
C12orf63	ELP2P	0.117	-0.596
C12orf63	EPO	0.089	-0.503
C12orf63	FAM72B	0.215	-0.554
C12orf63	FBXL12	0.166	-0.52
C10orf99	FLJ45983	0.116	-0.666
C12orf63	FXYD5	0.062	-0.536
C10orf99	HMX3	0.058	-0.644
C12orf63	HSPB11	0.076	-0.6
C12orf50	LOC100329108	0.017	-0.526
C12orf63	LOC100329108	0.093	-0.54
C12orf63	LOC154761	0.157	-0.533
C12orf63	LOC220930	0.194	-0.506
C11orf35	LOC442308	0.232	-0.502
C12orf63	LOC439994	0.102	-0.514
C12orf63	LRRC42	0.176	-0.548
C10orf99	MIR1908	0.224	-0.518
C12orf26	MIR1296	0.021	-0.516
C12orf26	MIR181B1	0.19	-0.522
C10orf99	MIR196B	0.031	-0.518
C12orf26	MIR548K	0.131	-0.575
C12orf63	MIR638	0.234	-0.506
C12orf63	MKI67IP	0.131	-0.52
C11orf35	OR13F1	0.217	-0.535
C11orf35	OR52A5	0.172	-0.674
C12orf26	OR52A5	0.06	-0.51
C11orf35	PRPS1L1	0.218	-0.596
C12orf26	PRPS1L1	0.022	-0.515
C12orf63	PRR24	0.105	-0.53
C10orf99	RAB6C	0.036	-0.518
C12orf63	REL	0.067	-0.596
C12orf26	SNORA2B	0.109	-0.554
C11orf35	SNORA40	0.129	-0.558
C12orf26	SNORA40	0.057	-0.514
C12orf32	SNORA40	0.156	-0.514
C12orf63	SNORD12C	0.134	-0.502
C12orf26	STH	0.198	-0.514
C12orf26	TIGD7	0.102	-0.596
C12orf63	WASH5P	0.217	-0.513
C12orf74	C14orf39	0.106	-0.589
C12orf69	C18orf22	0.039	-0.537
C14orf128	C1orf185	0.006	-0.519
C12orf74	CBLN1	0.063	-0.529
C12orf69	CCDC82	0.135	-0.527
C12orf77	CDK20	0.191	-0.532
C14orf128	CEACAM20	0.049	-0.569
C14orf128	CEP68	0.156	-0.547
C14orf128	CYSLTR2	0.002	-0.679
C12orf77	DBX1	0.015	-0.533
C14orf128	DEFB108B	0.041	-0.533
C12orf74	DLX2	0.228	-0.518
C12orf77	DMRTA2	0.033	-0.521
C12orf69	EIF4ENIF1	0.204	-0.509
C12orf69	EIF5A	0.052	-0.567
C12orf69	ELP2P	0.029	-0.58
C12orf70	ELP2P	0.118	-0.518
C12orf77	EMX2	0.066	-0.502
C14orf128	FAM151A	0.087	-0.56
C14orf128	FAM183B	0.108	-0.514
C12orf69	FAM72B	0.049	-0.62
C12orf70	FAM72B	0.183	-0.51
C12orf69	FBXO48	0.007	-0.519
C12orf69	FDXR	0.073	-0.54
C12orf74	FLJ45983	0.086	-0.691
C12orf74	FOXA1	0.012	-0.512
C12orf77	FOXD1	0.146	-0.525
C14orf128	FOLR2	0.14	-0.528
C14orf128	FOXI1	0.188	-0.544
C12orf69	GGNBP2	0.013	-0.592
C12orf70	GGNBP2	0.016	-0.514
C14orf128	GRPR	0.043	-0.501
C12orf77	HAND2	0.072	-0.535
C14orf128	HAO1	0.216	-0.522
C12orf74	HIST1H4E	0.198	-0.534
C12orf77	HIST3H2A	0.226	-0.562
C12orf77	HIST3H2BB	0.238	-0.513
C14orf128	HIST1H1T	0.09	-0.503
C14orf19	HIST1H4E	0.149	-0.508
C12orf74	HMX3	0.005	-0.715
C14orf183	HMX3	0.002	-0.569
C12orf74	HOXA9	0.075	-0.518
C12orf74	HOXD8	0.003	-0.522
C12orf70	HSPB11	0.009	-0.514
C12orf74	IRX5	0.05	-0.541
C12orf77	IRX3	0.043	-0.526
C12orf69	JRKL	0.148	-0.522
C12orf69	LASS5	0.013	-0.501
C12orf74	LHX1	0.174	-0.517
C12orf77	LHX1	0.022	-0.605
C12orf69	LOC100329108	0.06	-0.54
C12orf77	LOC100270746	0.037	-0.52
C12orf69	LOC143666	0.146	-0.507
C12orf69	LOC154761	0.176	-0.533
C12orf69	LOC220930	0.123	-0.534
C14orf128	LOC340017	0.128	-0.528
C14orf128	LOC388387	0.178	-0.516
C12orf70	LOC439994	0.089	-0.511
C14orf128	LOC648740	0.163	-0.529
C12orf77	MAFB	0.053	-0.501
C12orf69	ME2	0.086	-0.501
C14orf128	MIR103-1	0.054	-0.57
C14orf128	MIR103-1AS	0.083	-0.516
C14orf128	MIR103-2	0.076	-0.565
C12orf74	MIR129-2	0.052	-0.584
C12orf74	MIR1908	0.157	-0.65
C14orf128	MIR133B	0.135	-0.547
C14orf128	MIR181A2	0.152	-0.518
C14orf128	MIR181B2	0.152	-0.518
C12orf69	MIR484	0.021	-0.535
C14orf128	MIR548B	0.189	-0.52
C14orf128	MIR573	0.033	-0.536
C12orf69	MIR638	0.077	-0.504
C12orf74	MIR663	0.042	-0.519
C12orf69	MKI67IP	0.041	-0.545
C14orf39	MIR941-1	0.149	-0.555
C14orf39	MIR941-2	0.181	-0.521
C14orf39	MIR941-3	0.181	-0.521
C14orf128	MMP26	0.054	-0.502
C14orf128	MRS2P2	0.048	-0.519
C14orf128	MS4A5	0.041	-0.554
C14orf128	MUPCDH	0.006	-0.514
C14orf128	NACA2	0.058	-0.514
C12orf69	NDUFB3	0.065	-0.521
C12orf77	ONECUT2	0.145	-0.514
C14orf128	OR13F1	0.016	-0.581
C14orf128	OR2T1	0.005	-0.514
C13orf1	OR52A5	0.103	-0.549
C14orf128	OR52H1	0.093	-0.58
C14orf128	OR6F1	0.034	-0.501
C14orf128	OR6K2	0.047	-0.548
C12orf74	POU3F2	0.059	-0.53
C12orf74	POU3F3	0.088	-0.517
C14orf128	POU5F1	0.113	-0.552
C12orf69	PPP3CC	0.173	-0.528
C14orf128	PTPDC1	0.171	-0.509
C12orf74	RAB6C	0.028	-0.572
C12orf74	RAD21L1	0.045	-0.601
C12orf77	RASSF10	0.078	-0.563
C12orf70	REL	0.085	-0.505
C14orf128	REG1A	0.039	-0.547
C12orf69	RPGRIP1L	0.131	-0.502
C12orf69	RRP8	0.086	-0.561
C12orf69	SEH1L	0.063	-0.537
C12orf69	SEPT11	0.037	-0.549
C14orf128	SIRPD	0.031	-0.516
C14orf128	SLC24A1	0.06	-0.552
C12orf69	SNORD12C	0.009	-0.548
C14orf128	SNORD119	0.026	-0.54
C12orf74	SP5	0.094	-0.545
C12orf77	SP9	0.066	-0.535
C12orf69	SVIP	0.017	-0.603
C12orf77	THBD	0.003	-0.516
C14orf128	TMED10P	0.06	-0.525
C14orf128	TMEM14E	0.012	-0.509
C12orf77	TSHZ3	0.16	-0.597
C12orf74	VAX1	0.165	-0.511
C12orf77	VAX1	0.074	-0.543
C14orf128	WDR64	0.01	-0.567
C12orf74	ZNF503	0.087	-0.509
C12orf69	ZNF768	0.231	-0.521
C12orf69	ZNF780B	0.013	-0.566
C16orf10	C5orf47	0.116	-0.518
C17orf50	FAM72B	0.202	-0.51
C15orf55	HMX3	0.031	-0.51
C16orf3	LOC100329108	0.15	-0.502
C15orf55	MIR1908	0.079	-0.527
C16orf10	MIR548K	0.14	-0.501
C17orf50	NPBWR1	0.003	-0.546
C16orf10	OR52H1	0.118	-0.517
C17orf50	SEPT11	0.0	-0.501
C18orf22	C5orf47	0.069	-0.503
C18orf54	C5orf47	0.0	-0.511
C18orf22	CEACAM20	0.121	-0.514
C18orf18	CLDN20	0.087	-0.532
C19orf61	CLDN20	0.118	-0.515
C18orf22	COL10A1	0.023	-0.534
C18orf18	CYSLTR2	0.105	-0.585
C18orf22	CYSLTR2	0.151	-0.662
C18orf54	CYSLTR2	0.051	-0.546
C19orf36	CYSLTR2	0.078	-0.563
C19orf61	CYSLTR2	0.189	-0.534
C17orf78	FAM72B	0.169	-0.513
C18orf18	FOXI1	0.136	-0.539
C18orf22	FOXI1	0.205	-0.528
C19orf36	GOLGA6C	0.026	-0.506
C17orf88	HMX3	0.046	-0.502
C18orf18	KCNJ13	0.023	-0.509
C19orf61	LOC340017	0.186	-0.508
C18orf18	LOC442308	0.011	-0.522
C18orf22	MIR103-1	0.153	-0.509
C19orf61	MIR103-1	0.181	-0.524
C17orf88	MIR1908	0.192	-0.501
C18orf18	MIR181B1	0.148	-0.511
C18orf22	MIR181A2	0.128	-0.514
C18orf22	MIR181B1	0.09	-0.585
C18orf22	MIR181B2	0.128	-0.514
C19orf36	MIR181B1	0.171	-0.504
C18orf18	MIR548K	-0.0	-0.516
C18orf22	MIR548A1	0.068	-0.518
C18orf22	MIR548K	0.015	-0.564
C18orf22	MIR573	0.102	-0.509
C19orf61	MIR548K	0.123	-0.564
C19orf61	MIR573	0.158	-0.516
C18orf22	MIRLET7A2	0.019	-0.53
C18orf22	MRS2P2	0.181	-0.508
C19orf61	MRS2P2	0.113	-0.521
C18orf22	MS4A5	0.148	-0.527
C19orf61	MS4A5	0.143	-0.515
C18orf22	NACA2	0.179	-0.503
C18orf22	OR13F1	0.136	-0.521
C19orf61	OR13F1	0.123	-0.517
C18orf22	OR52A5	0.019	-0.606
C18orf22	OR52H1	0.12	-0.515
C19orf61	OR52A5	0.035	-0.555
C18orf18	PHF3	0.191	-0.507
C18orf22	PHF3	0.042	-0.561
C18orf54	PHF3	0.008	-0.506
C18orf18	PRPS1L1	0.013	-0.533
C19orf61	PRPS1L1	0.02	-0.515
C18orf18	REG1A	0.109	-0.529
C18orf18	SCARNA23	0.159	-0.505
C18orf18	SNORA2B	0.031	-0.563
C18orf22	SNORA2B	0.025	-0.608
C19orf36	SNORA2B	0.006	-0.52
C19orf61	SNORA2B	0.105	-0.563
C18orf22	SNORD119	0.133	-0.522
C18orf18	STH	0.047	-0.523
C18orf22	STH	0.053	-0.555
C18orf18	SUMO4	0.018	-0.513
C18orf18	TIGD7	0.15	-0.541
C19orf61	TIGD7	0.126	-0.573
C18orf18	TMED10P	0.06	-0.512
C18orf18	TMEM30C	0.093	-0.515
C18orf22	WDR64	0.178	-0.525
C18orf18	ZFP14	0.132	-0.511
C18orf22	ZFP14	0.072	-0.518
C1orf110	CASP9	0.087	-0.538
C19orf70	CLDN20	0.108	-0.612
C19orf70	CPXCR1	0.143	-0.534
C19orf70	CYSLTR2	0.233	-0.7
C19orf70	DEFB108B	0.215	-0.54
C19orf70	DISC2	0.189	-0.502
C1orf185	EIF4ENIF1	0.09	-0.517
C1orf223	EIF5A	0.18	-0.528
C1orf189	ELP2P	0.139	-0.511
C1orf223	ELP2P	0.003	-0.523
C1orf189	FAM72B	0.158	-0.558
C1orf223	FAM72B	0.028	-0.539
C1orf110	FBXL12	0.16	-0.52
C1orf185	FBXL12	0.034	-0.529
C1orf223	FBXL12	0.012	-0.547
C1orf186	FLJ45983	0.055	-0.535
C1orf110	FXYD5	0.043	-0.548
C1orf110	GCSH	0.225	-0.526
C1orf185	GCSH	0.032	-0.515
C1orf223	GCSH	0.129	-0.511
C1orf110	HSPB11	0.045	-0.553
C1orf189	HSPB11	0.129	-0.501
C1orf110	LOC100128822	0.19	-0.505
C1orf110	LOC100329108	0.119	-0.585
C1orf201	LOC100329108	0.108	-0.504
C1orf223	LOC100329108	0.044	-0.569
C19orf70	LOC283174	0.181	-0.509
C1orf185	LOC143666	0.028	-0.512
C1orf223	LOC154761	0.091	-0.524
C19orf70	LOC442308	0.051	-0.549
C1orf185	LOC439994	0.009	-0.511
C1orf223	LOC729338	0.025	-0.507
C1orf110	LRRC42	0.133	-0.513
C1orf185	LRRC42	0.059	-0.548
C1orf223	LRRC42	0.027	-0.553
C19orf70	MIR181A2	0.246	-0.592
C19orf70	MIR181B1	0.219	-0.566
C19orf70	MIR181B2	0.246	-0.592
C19orf70	MIR548A1	0.124	-0.505
C1orf110	MIR636	0.005	-0.561
C1orf223	MKI67IP	0.07	-0.504
C19orf70	OR13F1	0.103	-0.579
C19orf70	OR4Q3	0.2	-0.565
C19orf70	OR52A5	0.102	-0.745
C1orf31	OR52A5	0.044	-0.534
C19orf70	OR5K4	0.115	-0.504
C19orf70	OR8U1	0.095	-0.564
C19orf70	PHF3	0.18	-0.539
C19orf70	PRO1768	0.202	-0.546
C19orf70	PRPS1L1	0.083	-0.655
C1orf223	PRR24	0.043	-0.529
C1orf185	PVRL2	0.077	-0.504
C1orf189	REL	0.146	-0.522
C19orf70	SCARNA23	0.163	-0.511
C1orf185	SEH1L	0.026	-0.526
C19orf70	SNORA2B	0.131	-0.595
C19orf70	SNORA40	0.058	-0.633
C1orf31	SNORA40	0.078	-0.508
C1orf110	SNORD12C	0.083	-0.503
C1orf223	SNORD12C	0.043	-0.525
C19orf70	SNORD88B	0.176	-0.598
C19orf70	SNORD91A	0.141	-0.555
C19orf70	ST7OT3	0.201	-0.509
C19orf70	STH	0.152	-0.557
C19orf70	SUMO4	0.077	-0.62
C1orf185	SVIP	0.038	-0.519
C19orf70	TIGD7	0.118	-0.635
C19orf70	TMEM14E	0.234	-0.515
C19orf70	TMEM30C	0.212	-0.541
C19orf70	TMPRSS11D	0.1	-0.535
C19orf70	ZFP14	0.123	-0.524
C1orf223	ZNF780B	0.06	-0.528
C1orf93	C5orf47	0.209	-0.526
C1orf93	CLDN20	0.11	-0.528
C1orf93	CYSLTR2	0.246	-0.53
C20orf194	CYSLTR2	0.167	-0.588
C20orf194	DISC2	0.03	-0.51
C20orf118	FLJ45983	0.187	-0.508
C20orf118	HMX3	0.07	-0.569
C1orf93	KRTAP4-8	0.132	-0.512
C1orf93	LOC340017	0.246	-0.53
C20orf194	MIR181B1	0.093	-0.551
C1orf93	MIR548A1	0.17	-0.516
C1orf93	MIR548K	0.186	-0.567
C1orf93	MIR573	0.191	-0.524
C20orf194	MIR548K	0.076	-0.536
C20orf20	MIR548B	0.028	-0.514
C20orf194	MS4A5	0.149	-0.533
C1orf93	OR13F1	0.062	-0.512
C20orf194	OR13F1	0.056	-0.517
C1orf93	OR52A5	0.097	-0.512
C20orf194	OR8U1	0.087	-0.531
C20orf194	PHF3	0.106	-0.52
C1orf93	SNORA2B	0.188	-0.58
C20orf194	SNORA2B	0.063	-0.618
C20orf194	SNORA40	0.104	-0.515
C20orf194	SNORD11	0.039	-0.511
C20orf194	SNORD119	0.206	-0.505
C1orf93	STH	0.154	-0.554
C20orf194	STH	0.125	-0.53
C20orf194	SUMO4	0.045	-0.521
C1orf93	TIGD7	0.172	-0.56
C20orf194	TIGD7	0.043	-0.586
C20orf194	ZFP14	0.055	-0.502
C21orf71	CBLN1	0.028	-0.538
C21orf67	FLJ45983	0.062	-0.524
C21orf71	FLJ45983	0.042	-0.601
C21orf71	HIST1H4E	0.132	-0.515
C21orf71	HMX3	0.016	-0.649
C21orf71	IRX5	0.078	-0.518
C21orf71	MIR129-2	0.108	-0.516
C21orf71	MIR1908	0.111	-0.564
C21orf71	MYADM	0.205	-0.519
C21orf71	RAD21L1	0.021	-0.513
C3orf47	CLDN20	0.079	-0.536
C3orf47	CYSLTR2	0.209	-0.571
C3orf79	FLJ45983	0.108	-0.549
C3orf79	HMX3	0.022	-0.592
C3orf79	LOC439994	0.006	-0.51
C3orf79	MIR1908	0.151	-0.532
C3orf47	PRO1768	0.03	-0.506
C3orf79	RAD21L1	0.008	-0.511
C3orf47	SNORA2B	-0.0	-0.555
C3orf47	STH	0.036	-0.504
C3orf47	TIGD7	0.127	-0.531
C5orf47	C6orf211	0.218	-0.516
C5	CCDC82	0.024	-0.554
C5orf47	CCDC59	0.182	-0.568
C5orf47	CCDC82	0.182	-0.505
C5orf47	CHRAC1	0.199	-0.512
C5orf47	DNPEP	0.067	-0.524
C5	EIF4ENIF1	0.17	-0.503
C5	EIF5A	0.022	-0.501
C5orf47	EIF4ENIF1	0.225	-0.614
C5orf47	EIF5A	0.145	-0.648
C5	FAM72B	0.015	-0.555
C5orf47	FAM72B	0.047	-0.612
C5	FBXL12	0.002	-0.532
C5orf47	FDXR	0.216	-0.509
C5orf47	GCSH	0.124	-0.64
C5	GORASP1	0.009	-0.502
C5orf47	GORASP1	0.144	-0.546
C5	HMX3	0.035	-0.538
C5orf47	IMPA2	0.201	-0.592
C5	JRKL	0.035	-0.551
C5orf47	JRKL	0.203	-0.503
C5orf47	KRTCAP2	0.249	-0.504
C5orf47	LASS5	0.023	-0.574
C5orf47	LOC100128822	0.089	-0.674
C5	LOC100329108	0.031	-0.519
C5orf47	LOC100329108	0.015	-0.712
C5orf47	LOC143666	0.125	-0.609
C5orf47	LOC154761	0.109	-0.594
C5orf47	LOC220930	0.048	-0.583
C5orf47	LOC284900	0.063	-0.586
C5	LRRC42	0.048	-0.546
C5orf47	LRRC42	0.001	-0.686
C5	MARCH11	0.016	-0.532
C5orf47	ME2	0.122	-0.558
C4orf6	MIR1908	0.038	-0.506
C5	MIR1908	0.065	-0.538
C5orf47	MIR484	0.063	-0.563
C5orf47	MIR933	0.01	-0.504
C5orf47	MKI67IP	0.081	-0.575
C5orf47	NDUFB3	0.197	-0.531
C5	NPBWR1	0.032	-0.504
C5orf47	NQO2	0.242	-0.534
C5orf47	OBFC1	0.066	-0.512
C5	PEX11A	0.1	-0.515
C5orf47	PEX11A	0.192	-0.507
C5orf47	PPP3CC	0.206	-0.533
C5orf47	PVRL2	0.235	-0.617
C5orf47	RAB2B	0.071	-0.541
C5orf47	RAB43	0.074	-0.571
C5orf47	RRP8	0.102	-0.517
C5orf47	SEH1L	0.083	-0.6
C5orf47	SEPT11	0.018	-0.517
C5orf47	SNORD12C	0.064	-0.596
C5	SVIP	0.047	-0.502
C5orf47	SVIP	0.074	-0.569
C5orf47	TMEM141	0.074	-0.616
C5orf47	TMEM87B	0.027	-0.568
C5orf47	TOX4	0.027	-0.539
C5orf47	TSEN34	0.209	-0.518
C5	TTC21A	0.006	-0.505
C5orf47	TTC21A	0.091	-0.562
C5orf47	WASH5P	0.103	-0.57
C5orf47	ZNF333	0.144	-0.503
C5orf47	ZNF480	0.189	-0.564
C5orf47	ZNF768	0.111	-0.541
C5	ZNF780B	0.075	-0.501
C5orf47	ZNF780B	0.079	-0.601
C6orf222	HIST1H4E	0.095	-0.518
C6orf59	HMX3	0.141	-0.518
C7orf33	LOC100329108	0.021	-0.51
C6orf222	MIR1908	0.096	-0.549
C6orf211	MIR548K	0.137	-0.587
C6orf211	MIR573	0.099	-0.521
C6orf211	SNORA2B	0.061	-0.553
C6orf211	STH	0.178	-0.516
C9orf102	CASP9	0.149	-0.533
C9orf163	CLDN20	0.19	-0.516
C8orf46	FLJ45983	0.218	-0.572
C9orf102	FXYD5	0.065	-0.531
C8orf46	HMX3	0.112	-0.598
C9orf130	HMX3	0.178	-0.521
C9orf102	HSPB11	0.085	-0.526
C9orf102	MARCH11	0.006	-0.509
C9orf163	MIR548K	0.123	-0.532
C9orf163	OR52A5	0.093	-0.523
C9orf163	SNORA2B	0.115	-0.556
C9orf163	TIGD7	0.146	-0.573
C9orf89	CLDN20	0.205	-0.501
C9orf84	ELP2P	0.071	-0.51
C9orf84	FAM72B	0.185	-0.502
C9orf84	HES4	0.015	-0.502
C9orf84	HMX3	0.091	-0.517
CACNG8	LILRB4	0.097	-0.536
C9orf84	LOC439994	0.103	-0.528
C9orf84	MIR1908	0.197	-0.501
C9orf89	MIR548K	0.165	-0.56
CACNG8	MSGN1	0.018	-0.511
C9orf82	OR52A5	0.107	-0.517
C9orf89	OR52A5	0.064	-0.538
CALM3	OR52A5	0.081	-0.517
C9orf89	PRPS1L1	0.094	-0.503
C9orf84	RAB6C	0.103	-0.509
C9orf84	SEPT11	0.024	-0.529
C9orf89	SNORA2B	0.178	-0.528
C9orf89	TIGD7	0.148	-0.549
CASP9	CCDC91	0.034	-0.548
CASP9	CCT4	0.112	-0.501
CASP9	CEP68	0.109	-0.625
CASP9	CHCHD3	0.14	-0.503
CASP9	CYSLTR2	0.017	-0.596
CASP9	DDI1	0.048	-0.501
CASP9	DUSP28	0.111	-0.505
CASP5	ELP2P	0.144	-0.525
CASP9	FAM177A1	0.044	-0.584
CASP9	FAM183B	0.013	-0.547
CAPZA3	FAM59A	0.023	-0.501
CASP5	FAM72B	0.193	-0.563
CASP9	FCGR2B	0.078	-0.534
CASP9	FOLR2	0.146	-0.596
CASP9	FOXI1	0.146	-0.528
CASP9	HAO1	0.155	-0.51
CASP5	HSPB11	0.013	-0.518
CASP9	HYAL4	0.063	-0.507
CASP9	IFNA7	0.071	-0.518
CASP9	IGLL3	0.055	-0.587
CASP9	INCENP	0.049	-0.504
CASP9	IPW	0.145	-0.509
CASP9	ISLR	0.105	-0.515
CASP9	ISPD	0.121	-0.523
CASP9	KRT76	0.013	-0.514
CASP5	LOC154761	0.184	-0.506
CASP9	LOC340017	0.017	-0.658
CASP9	LOC388387	0.115	-0.54
CASP5	LOC439994	0.059	-0.53
CASP9	LOC648740	0.024	-0.63
CASP9	LRRC18	0.03	-0.51
CASP9	MIR103-2	0.044	-0.621
CASP9	MIR133B	0.03	-0.614
CASP9	MIR548B	0.056	-0.6
CASP9	MIR939	0.026	-0.501
CASP9	MMP26	0.073	-0.587
CASP9	MRAP	0.023	-0.51
CASP9	MS4A5	0.003	-0.592
CASP9	MYL1	0.028	-0.533
CASP9	MYLPF	0.086	-0.555
CASP9	NAA15	0.012	-0.549
CASP5	NCRNA00115	0.101	-0.509
CASP9	OAS1	0.184	-0.506
CASP9	OR14A16	0.039	-0.613
CASP9	OR5K4	0.048	-0.516
CASP9	PLAC1L	0.034	-0.506
CASP9	PMFBP1	0.065	-0.513
CASP9	POU5F1	0.019	-0.566
CASP9	PTPDC1	0.182	-0.506
CASP9	PTPN2	0.133	-0.526
CASP5	REL	0.072	-0.529
CASP9	REG1A	0.068	-0.534
CASP9	SAG	0.098	-0.504
CASP9	SERPINC1	0.082	-0.517
CASP9	SIRPD	0.038	-0.518
CASP9	SLC24A1	0.031	-0.544
CASP9	SNORD119	0.015	-0.523
CASP9	SNORD82	0.093	-0.528
CASP9	STT3B	0.067	-0.532
CASP9	TBX19	0.102	-0.542
CASP9	TM7SF4	0.102	-0.524
CASP9	WDR64	0.026	-0.56
CARD18	ZDBF2	0.008	-0.515
CASP9	ZNF292	0.1	-0.525
CASP9	ZNF451	0.069	-0.512
CATSPER3	CCDC59	0.083	-0.502
CBLN1	CD53	0.091	-0.522
CBLN1	CXCR5	0.12	-0.507
CATSPER3	EIF4ENIF1	0.208	-0.552
CATSPER3	EIF5A	0.056	-0.585
CBLN1	EHD1	0.062	-0.505
CCDC141	FAM72B	0.16	-0.535
CBLN1	FGD2	0.073	-0.521
CC2D2B	FLJ45983	0.095	-0.509
CATSPER3	GCSH	0.092	-0.57
CATSPER3	GORASP1	0.065	-0.503
CCDC141	HSPB11	0.097	-0.501
CATSPER3	LOC100128822	0.125	-0.57
CATSPER3	LOC100329108	0.004	-0.64
CATSPER3	LOC143666	0.082	-0.57
CATSPER3	LOC154761	0.034	-0.563
CATSPER3	LOC220930	0.014	-0.537
CATSPER3	LOC284900	0.052	-0.545
CATSPER3	ME2	0.059	-0.527
CATSPER3	MIR484	0.046	-0.565
CATSPER2P1	MIR548K	0.226	-0.538
CATSPER3	MKI67IP	0.056	-0.566
CBLN1	MIR922	0.102	-0.539
CBLN1	MIR941-1	0.095	-0.521
CATSPER3	PPP3CC	0.147	-0.506
CATSPER3	PVRL2	0.192	-0.509
CATSPER3	RAB2B	0.023	-0.521
CATSPER3	RAB43	0.007	-0.512
CCDC141	REL	0.068	-0.514
CATSPER3	SEH1L	0.081	-0.561
CBLN1	SFT2D3	0.048	-0.518
CBLN1	SLC6A16	0.01	-0.546
CATSPER3	SVIP	0.096	-0.538
CATSPER2P1	TIGD7	0.205	-0.527
CATSPER3	TMEM141	0.092	-0.541
CATSPER3	TMEM87B	0.027	-0.509
CATSPER3	TSEN34	0.121	-0.518
CATSPER3	TTC21A	0.016	-0.524
CATSPER3	ZNF480	0.193	-0.505
CATSPER3	ZNF780B	0.008	-0.588
CCDC59	CLDN20	0.128	-0.547
CCDC82	CLDN20	0.12	-0.694
CCDC82	CLDN8	0.146	-0.517
CCDC82	COL10A1	0.085	-0.566
CCDC82	CPXCR1	0.131	-0.514
CCDC59	CYSLTR2	0.167	-0.581
CCDC82	CYSLTR2	0.169	-0.738
CCDC82	DEFB108B	0.146	-0.599
CCDC59	DISC2	0.18	-0.568
CCDC82	DISC2	0.12	-0.625
CCDC91	ELP2P	0.069	-0.522
CCDC82	FAM10A4	0.126	-0.521
CCDC59	FAM151A	0.209	-0.52
CCDC82	FAM183B	0.223	-0.531
CCDC70	FAM72B	0.183	-0.504
CCDC91	FAM72B	0.083	-0.533
CCDC91	FBXL12	0.071	-0.549
CCDC50	FLJ45983	0.245	-0.584
CCDC91	FXYD5	0.013	-0.556
CCDC70	GGNBP2	0.062	-0.515
CCDC91	IGSF8	0.113	-0.502
CCDC82	KCNJ13	0.018	-0.547
CCDC82	KLF17	0.157	-0.556
CCDC82	KRBA2	0.231	-0.547
CCDC82	LINGO2	0.178	-0.533
CCDC82	LOC100129550	0.145	-0.51
CCDC82	LOC100130000	0.074	-0.517
CCDC91	LOC100128822	0.139	-0.532
CCDC91	LOC100329108	0.059	-0.573
CCDC82	LOC283174	0.076	-0.58
CCDC91	LOC154761	0.127	-0.536
CCDC82	LOC285735	0.106	-0.539
CCDC82	LOC341056	0.213	-0.521
CCDC59	LOC442308	0.026	-0.503
CCDC82	LOC402644	0.186	-0.542
CCDC82	LOC442308	0.023	-0.648
CCDC82	LOC727896	0.161	-0.545
CCDC82	LRRC18	0.162	-0.515
CCDC91	LRRC42	0.057	-0.536
CCDC82	MIR103-1	0.204	-0.606
CCDC82	MIR103-1AS	0.202	-0.516
CCDC59	MIR1296	0.079	-0.517
CCDC59	MIR181B1	0.188	-0.55
CCDC82	MIR1288	0.084	-0.515
CCDC82	MIR1296	0.014	-0.557
CCDC82	MIR133B	0.219	-0.519
CCDC82	MIR181A2	0.182	-0.634
CCDC82	MIR181B1	0.127	-0.654
CCDC82	MIR181B2	0.182	-0.634
CCDC82	MIR1913	0.196	-0.61
CCDC82	MIR29B1	0.145	-0.524
CCDC59	MIR548A1	0.06	-0.539
CCDC59	MIR548K	0.127	-0.613
CCDC59	MIR573	0.107	-0.532
CCDC82	MIR548A1	0.049	-0.602
CCDC82	MIR548K	0.155	-0.582
CCDC82	MIR551B	0.063	-0.516
CCDC82	MIR573	0.128	-0.523
CCDC82	MIRLET7A2	0.044	-0.582
CCDC82	MMP20	0.1	-0.524
CCDC59	MRS2P2	0.186	-0.51
CCDC82	MRS2P2	0.219	-0.537
CCDC59	MS4A5	0.194	-0.539
CCDC82	MS4A5	0.16	-0.602
CCDC82	NACA2	0.174	-0.548
CCDC82	NPL	0.198	-0.503
CCDC82	OR13F1	0.164	-0.591
CCDC82	OR2T8	0.129	-0.56
CCDC82	OR4D10	0.087	-0.529
CCDC59	OR52A5	0.057	-0.513
CCDC59	OR52H1	0.191	-0.547
CCDC82	OR4Q3	0.237	-0.534
CCDC82	OR52A5	0.042	-0.731
CCDC82	OR52H1	0.196	-0.534
CCDC82	OR5AK2	0.041	-0.551
CCDC82	OR5K4	0.126	-0.569
CCDC82	OR6F1	0.21	-0.503
CCDC82	OR8U1	0.083	-0.621
CCDC82	PAGE1	0.164	-0.502
CCDC59	PHF3	0.209	-0.517
CCDC82	PHF3	0.157	-0.63
CCDC82	PRO1768	0.084	-0.605
CCDC82	PRPS1L1	0.042	-0.734
CCDC91	PRR24	0.056	-0.51
CCDC82	REG1A	0.198	-0.596
CCDC91	REL	0.09	-0.541
CCDC82	S100G	0.086	-0.529
CCDC59	SCARNA6	0.097	-0.506
CCDC82	SCARNA14	0.094	-0.524
CCDC82	SCARNA23	0.108	-0.587
CCDC91	SEH1L	0.136	-0.508
CCDC82	SIRPD	0.201	-0.529
CCDC82	SLC24A1	0.22	-0.575
CCDC59	SNORA2B	0.081	-0.582
CCDC82	SNORA2B	0.036	-0.69
CCDC59	SNORA40	0.033	-0.514
CCDC82	SNORA40	0.054	-0.71
CCDC82	SNORA42	0.195	-0.552
CCDC82	SNORD11	0.061	-0.52
CCDC82	SNORD114-29	0.136	-0.509
CCDC82	SNORD119	0.237	-0.616
CCDC91	SNORD12C	0.069	-0.515
CCDC82	SNORD88B	0.213	-0.604
CCDC82	SNORD91A	0.179	-0.591
CCDC82	SNORD92	0.06	-0.548
CCDC82	SPZ1	0.104	-0.565
CCDC59	STH	0.174	-0.55
CCDC82	ST7OT3	0.224	-0.57
CCDC82	STH	0.14	-0.662
CCDC82	SUMO4	0.065	-0.653
CCDC82	TAS2R3	0.149	-0.572
CCDC82	TAS2R5	0.158	-0.571
CCDC59	TIGD7	0.099	-0.606
CCDC82	TIGD7	0.141	-0.714
CCDC82	TMED10P	0.169	-0.552
CCDC82	TMEM14E	0.228	-0.595
CCDC82	TMEM218	0.212	-0.539
CCDC82	TMEM30C	0.199	-0.589
CCDC82	TMPRSS11D	0.089	-0.593
CCDC82	ZFP14	0.116	-0.577
CCT4	ELP2P	0.206	-0.577
CCT4	FBXL12	0.085	-0.524
CCL14-CCL15	FLJ45983	0.076	-0.556
CCL15	FLJ45983	0.069	-0.601
CCT4	FXYD5	0.126	-0.524
CCT4	GGNBP2	0.18	-0.554
CCT4	HSPB11	0.171	-0.58
CCT4	LOC439994	0.107	-0.54
CCT4	LRRC42	0.227	-0.531
CCL14-CCL15	MIR1908	0.138	-0.529
CCL15	MIR1908	0.128	-0.542
CCT4	NCRNA00115	0.214	-0.51
CCT4	PRR24	0.114	-0.533
CCT4	REL	0.214	-0.593
CCT4	SEPT11	0.092	-0.579
CCL14-CCL15	SP5	0.031	-0.506
CCL15	SP5	0.037	-0.501
CD1C	DLX2	0.12	-0.505
CD200R1L	EIF5A	0.066	-0.507
CD53	FLJ45983	0.155	-0.641
CD74	FLJ45983	0.217	-0.561
CD84	FLJ45983	0.141	-0.521
CD200R1L	GGNBP2	0.001	-0.53
CD1C	HOXA10	0.055	-0.53
CD53	HMX3	0.092	-0.633
CD74	HMX3	0.116	-0.521
CD84	HMX3	0.043	-0.535
CD53	HOXA9	0.056	-0.522
CD53	HOXD8	0.027	-0.514
CD53	IRX5	0.096	-0.52
CD53	LHX1	0.194	-0.515
CD36	MIR1908	0.091	-0.548
CD200R1L	MKI67IP	0.009	-0.517
CD1C	MYADM	0.184	-0.543
CD200R1L	NCRNA00115	0.054	-0.501
CD36	RAD21L1	0.057	-0.516
CD200R1L	REL	0.01	-0.546
CDC40	SNORA40	0.117	-0.524
CD200R1L	SVIP	0.065	-0.505
CD53	TLX3	0.055	-0.524
CD1C	TSHZ3	0.162	-0.511
CD1C	ZDBF2	0.043	-0.528
CDR1	LOC100329108	0.124	-0.509
CDR1	MIR636	0.007	-0.545
CEACAM20	CMTM3	0.06	-0.56
CEP68	CMTM3	0.193	-0.531
CEACAM20	EIF5A	0.203	-0.572
CEACAM20	ELP2P	0.066	-0.597
CEP68	ELP2P	0.2	-0.647
CEACAM19	FAM72B	0.096	-0.502
CEACAM20	FAM72B	0.121	-0.578
CEP68	FAM72B	0.182	-0.635
CEACAM20	FBXL12	0.011	-0.621
CEP68	FBXL12	0.082	-0.624
CENPM	FLJ45983	0.215	-0.544
CEP68	FXYD5	0.033	-0.619
CEACAM20	GCSH	0.143	-0.568
CEP68	GGNBP2	0.055	-0.607
CEP68	HES4	0.155	-0.52
CENPM	HMX3	0.131	-0.567
CEP68	HSPB11	0.075	-0.679
CEP68	IGSF8	0.149	-0.57
CEACAM20	LASS5	-0.0	-0.505
CEP68	LASS5	0.118	-0.518
CEACAM20	LOC100128822	0.16	-0.539
CEACAM20	LOC100329108	0.089	-0.624
CEP68	LOC100329108	0.208	-0.626
CEACAM20	LOC143666	0.171	-0.501
CEACAM20	LOC154761	0.195	-0.595
CEACAM20	LOC220930	0.174	-0.524
CEP68	LOC154761	0.205	-0.595
CEACAM20	LOC439994	0.009	-0.605
CEP68	LOC439994	0.084	-0.605
CEP68	LOC729338	0.076	-0.516
CEACAM20	LRRC42	0.002	-0.609
CEP68	LRRC42	0.196	-0.599
CEP68	MARCH11	0.072	-0.579
CEACAM20	ME2	0.191	-0.522
CEACAM20	MIR484	0.133	-0.551
CDV3	MIR548K	0.203	-0.534
CEACAM20	MKI67IP	0.106	-0.609
CEP68	MKI67IP	0.228	-0.551
CEACAM20	NCRNA00115	0.099	-0.521
CEP68	NCRNA00115	0.225	-0.525
CEACAM20	OBFC1	0.141	-0.511
CDX2	OR52N2	0.012	-0.501
CDX2	PECAM1	0.019	-0.54
CEACAM20	PPP3CC	0.23	-0.503
CEP68	PRR24	0.178	-0.598
CEP68	REL	0.103	-0.647
CEACAM20	RRP8	0.156	-0.508
CEP68	RRP8	0.237	-0.565
CEACAM20	SEH1L	0.178	-0.584
CEACAM20	SEPT11	0.016	-0.525
CEP68	SEPT11	0.02	-0.574
CEP68	SERAC1	0.045	-0.539
CEACAM20	SNORD12C	0.117	-0.584
CEP68	SNORD12C	0.13	-0.559
CEACAM20	SVIP	0.182	-0.562
CEP68	SVIP	0.127	-0.575
CEACAM20	WASH5P	0.112	-0.54
CEACAM20	ZNF480	0.213	-0.503
CEACAM20	ZNF768	0.191	-0.522
CEACAM20	ZNF780B	0.157	-0.608
CEP68	ZNF780B	0.196	-0.572
CETN3	CLDN20	0.044	-0.531
CFH	ELP2P	0.052	-0.51
CFH	FAM72B	0.089	-0.545
CHCHD3	FBXL12	0.148	-0.514
CHCHD3	FXYD5	0.045	-0.53
CHCHD3	GGNBP2	0.125	-0.522
CHCHD3	HSPB11	0.075	-0.556
CHCHD3	LOC100329108	0.223	-0.519
CHCHD3	LRRC42	0.161	-0.508
CHCHD7	MIR548K	0.003	-0.514
CETN3	PHF3	0.117	-0.506
CHCHD3	REL	0.171	-0.518
CFH	RRP8	0.085	-0.526
CHCHD3	SEPT11	0.032	-0.505
CETN3	SNORA2B	0.008	-0.534
CHRAC1	CLDN20	0.132	-0.564
CHRAC1	CYSLTR2	0.196	-0.597
CHRAC1	DISC2	0.111	-0.551
CHRAC1	FAM151A	0.182	-0.51
CLCA3P	GGNBP2	0.025	-0.508
CHRAC1	KCNJ13	0.075	-0.508
CHRAC1	KLF17	0.094	-0.507
CHRAC1	MIR103-1	0.183	-0.524
CHRAC1	MIR133B	0.176	-0.501
CHRAC1	MIR181B1	0.205	-0.565
CHRAC1	MIR548A1	0.02	-0.536
CHRAC1	MIR548K	0.152	-0.584
CHRAC1	MIR573	0.049	-0.534
CHRAC1	MIRLET7A2	0.061	-0.539
CHRAC1	MRS2P2	0.2	-0.54
CHRAC1	MS4A5	0.171	-0.537
CHRAC1	NACA2	0.218	-0.503
CHRAC1	OR13F1	0.09	-0.512
CHRAC1	OR52A5	0.052	-0.594
CHRAC1	OR52H1	0.185	-0.527
CINP	OR52A5	0.154	-0.534
CITED2	OR52A5	0.083	-0.504
CHRAC1	PAGE1	0.094	-0.505
CHRAC1	PHF3	0.242	-0.53
CHRAC1	PRO1768	0.092	-0.515
CHRAC1	SNORA2B	0.095	-0.613
CHRAC1	STH	0.149	-0.555
CHRAC1	TIGD7	0.186	-0.559
CLDN20	COMMD5	0.108	-0.57
CLDN20	CSTB	0.206	-0.546
CLDN20	CYP2R1	0.175	-0.524
CLDN20	DHX34	0.169	-0.513
CLDN20	DPY30	0.155	-0.501
CLDN20	DSN1	0.148	-0.559
CLDN20	EIF4ENIF1	0.234	-0.568
CLDN20	EIF5A	0.017	-0.638
CLLU1	ELP2P	0.091	-0.519
CLLU1OS	ELP2P	0.091	-0.519
CLDN20	EPO	0.092	-0.515
CLDN22	FAM59A	0.091	-0.563
CLRN1	FAM59A	0.026	-0.504
CLDN20	FAM72B	0.036	-0.734
CLDN8	FAM72B	0.081	-0.547
CLLU1	FAM72B	0.137	-0.507
CLLU1OS	FAM72B	0.137	-0.507
CLDN20	FLJ39582	0.013	-0.606
CLEC1A	FLJ45983	0.023	-0.508
CLDN20	GEMIN4	0.181	-0.57
CLDN20	GORASP1	0.041	-0.571
CLDN20	H1FX	0.079	-0.536
CLDN20	HACL1	0.159	-0.516
CLDN20	HES4	0.004	-0.504
CLDN20	HNRNPA1	0.141	-0.524
CLDN20	HNRPA1L-2	0.135	-0.535
CLEC7A	HMX3	0.082	-0.516
CLPTM1L	HMX3	0.035	-0.528
CLDN20	HSPA1A	0.097	-0.589
CLDN20	JRKL	0.131	-0.686
CLDN8	JRKL	0.172	-0.507
CLDN20	KDSR	0.187	-0.501
CLDN20	KIAA1524	0.03	-0.574
CLDN20	KRTCAP2	0.166	-0.588
CLDN20	LOC100128822	0.154	-0.516
CLDN20	LOC100216545	0.121	-0.581
CLDN20	LOC100289511	0.06	-0.631
CLDN20	LOC100329108	0.019	-0.575
CLLU1	LOC100329108	0.103	-0.508
CLLU1OS	LOC100329108	0.103	-0.508
CLDN20	LOC143666	0.119	-0.552
CLDN20	LOC154761	0.094	-0.579
CLDN20	LOC220930	0.101	-0.592
CLDN20	LOC401397	0.051	-0.506
CLDN8	LOC439994	0.035	-0.544
CLDN20	LOC728190	0.161	-0.537
CLDN20	MANEA	0.105	-0.516
CLDN20	MAP1LC3B	0.215	-0.507
CLDN20	ME2	0.033	-0.596
CLDN20	MEA1	0.22	-0.507
CLDN22	MIR1908	0.038	-0.595
CLDN22	MIR34B	0.004	-0.503
CLDN20	MIR638	0.057	-0.627
CLDN20	MTRF1L	0.169	-0.598
CLDN20	NAT6	0.193	-0.528
CLDN8	NCRNA00115	0.094	-0.541
CLDN20	NDUFB3	0.064	-0.611
CLDN20	NQO2	0.184	-0.55
CLDN20	OBFC1	0.089	-0.575
CLDN22	ONECUT1	0.029	-0.51
CLDN22	ONECUT2	0.052	-0.512
CLDN20	PCBD2	0.182	-0.571
CLDN20	PEX11A	0.091	-0.631
CLDN20	PPP3CC	0.165	-0.596
CLDN20	PSMG1	0.065	-0.621
CLDN20	PVRL2	0.076	-0.564
CLDN22	RAD21L1	0.044	-0.524
CLLU1	REL	0.021	-0.514
CLLU1OS	REL	0.021	-0.514
CLDN20	RG9MTD2	0.039	-0.509
CLDN20	ROCK1	0.1	-0.565
CLDN20	RPGRIP1L	0.097	-0.655
CLDN20	RRP8	0.088	-0.702
CLDN8	RRP8	0.134	-0.543
CLDN22	SCN3B	0.023	-0.523
CLDN20	SCYL2	0.073	-0.515
CLDN20	SEH1L	0.024	-0.584
CLDN20	SEPT11	0.025	-0.612
CLDN20	SLC35F5	0.19	-0.566
CLDN20	SNORD74	0.162	-0.569
CLDN20	SNORD84	0.189	-0.524
CLDN20	SVIP	0.043	-0.664
CLDN20	TADA2A	0.164	-0.555
CLDN20	THAP5	0.249	-0.504
CLDN20	TMBIM6	0.18	-0.554
CLDN20	TMEM141	0.036	-0.56
CLDN20	TMEM194A	0.152	-0.541
CLDN20	TOP3B	0.021	-0.529
CLDN20	UTP3	0.005	-0.504
CLDN20	VAPB	0.191	-0.501
CLDN20	WDYHV1	0.154	-0.521
CLDN20	ZFC3H1	0.125	-0.555
CLDN22	ZDBF2	0.122	-0.528
CLDN20	ZNF10	0.213	-0.533
CLDN20	ZNF480	0.145	-0.555
CLDN22	ZNF503	0.029	-0.514
CLDN20	ZNF554	0.194	-0.545
CLDN20	ZNF768	0.127	-0.608
CMTM3	CYSLTR2	0.026	-0.62
CMTM3	FAM151A	0.062	-0.518
CMTM3	FOLR2	0.193	-0.508
CMTM3	LOC340017	0.109	-0.528
CMTM3	LOC648740	0.187	-0.501
CMTM3	MIR103-1	0.089	-0.524
CMTM3	MIR133B	0.098	-0.522
CMTM3	MIR181A1	0.017	-0.518
CMTM3	MIR181B1	0.029	-0.642
CMTM3	MRS2P2	0.076	-0.53
CMTM3	MS4A5	0.045	-0.525
CMTM3	OR13F1	0.058	-0.551
CMTM3	OR52H1	0.036	-0.532
CMTM3	REG1A	0.032	-0.505
CMTM3	SLC24A1	0.003	-0.511
CMTM3	WDR64	0.109	-0.546
COMMD5	CYSLTR2	0.185	-0.646
COMMD5	DISC2	0.09	-0.554
COL10A1	EIF5A	0.069	-0.595
COL10A1	FAM72B	0.087	-0.59
COL6A6	FAM72B	0.074	-0.536
COL10A1	FDXR	0.058	-0.546
COL10A1	FLJ39582	0.077	-0.546
COL10A1	GORASP1	0.116	-0.501
COL10A1	JRKL	0.103	-0.558
COL10A1	KRTCAP2	0.175	-0.542
COL10A1	LOC100329108	0.141	-0.573
COL10A1	LOC154761	0.193	-0.513
COL10A1	LOC220930	0.108	-0.558
COL10A1	ME2	0.11	-0.529
COMMD5	MIR103-1	0.146	-0.524
COMMD5	MIR181A2	0.018	-0.515
COMMD5	MIR181B1	0.212	-0.502
COMMD5	MIR181B2	0.018	-0.515
COMMD5	MIR548K	0.056	-0.554
COL10A1	MIR638	0.129	-0.522
COL10A1	MKI67IP	0.057	-0.631
COMMD5	MS4A5	0.108	-0.51
COL10A1	NDUFB3	0.059	-0.538
COL10A1	OBFC1	0.109	-0.512
COMMD5	OR13F1	0.138	-0.518
COMMD5	OR52A5	0.024	-0.629
COMMD5	OR8U1	0.127	-0.527
COL10A1	PEX11A	0.174	-0.512
COMMD5	PHF3	0.204	-0.527
COL10A1	PPP3CC	0.202	-0.52
COMMD5	PRO1768	0.024	-0.514
COL6A6	REL	0.002	-0.518
COL10A1	RPGRIP1L	0.17	-0.538
COL10A1	RRP8	0.108	-0.55
COL10A1	SEH1L	0.103	-0.531
COG7	SEPT11	0.068	-0.529
COMMD5	SNORA2B	0.023	-0.604
COMMD5	SNORA40	0.032	-0.602
COL10A1	SNORD12C	0.035	-0.566
COMMD5	SNORD88B	0.024	-0.506
COMMD5	STH	0.104	-0.542
COL10A1	SVIP	0.101	-0.568
COL10A1	TADA2A	0.185	-0.507
COMMD5	TIGD7	0.156	-0.592
COL10A1	TTC21A	0.052	-0.508
CPXCR1	ELP2P	0.015	-0.503
CPA5	FBXL12	0.036	-0.512
COTL1	FLJ45983	0.069	-0.512
CPXCR1	JRKL	0.139	-0.507
CPA5	LOC100128822	0.08	-0.508
CPXCR1	LOC100289511	0.109	-0.515
CPXCR1	NCRNA00115	0.061	-0.553
CPXCR1	RRP8	0.112	-0.536
CPXCR1	ZNF554	0.103	-0.535
CRYBG3	FLJ45983	0.041	-0.526
CSK	HMX3	0.197	-0.513
CRYZL1	OR52A5	0.187	-0.512
CSTB	CYSLTR2	0.237	-0.587
CSTB	DISC2	0.195	-0.53
CSTB	FAM151A	0.135	-0.508
CSTB	HIST1H1T	0.156	-0.505
CSTB	LOC402644	0.243	-0.512
CSTB	LOC648740	0.218	-0.508
CSTB	MIR103-1	0.165	-0.574
CSNK2A1P	MIR1908	0.123	-0.516
CSTB	MIR181A2	0.071	-0.54
CSTB	MIR181B2	0.071	-0.54
CSTB	MIR548A1	0.003	-0.523
CSTB	MIR548B	0.185	-0.51
CSTB	MIR548K	0.103	-0.549
CSTB	MIR573	0.008	-0.557
CSTB	MIRLET7A2	0.035	-0.512
CSTB	MRS2P2	0.157	-0.55
CSTB	MS4A5	0.071	-0.529
CSTB	OR13F1	0.106	-0.521
CSTB	OR52A5	0.087	-0.583
CSTB	OR52H1	0.128	-0.563
CTSL1	PECAM1	0.026	-0.578
CSTB	POU5F1	0.242	-0.505
CSTB	PRO1768	0.145	-0.529
CSTB	PRPS1L1	0.066	-0.566
CSTB	SNORA2B	0.064	-0.618
CTBS	SNORA2B	0.152	-0.503
CSTB	SNORA40	0.091	-0.601
CSTB	STH	0.191	-0.539
CSTB	SUMO4	0.016	-0.583
CSTB	TIGD7	0.223	-0.561
CTSL1	TRIM55	0.058	-0.505
CTXN3	FAM59A	0.086	-0.512
CXCR5	FLJ45983	0.145	-0.665
CXCR5	HMX3	0.095	-0.632
CXCR5	HOXA9	0.086	-0.521
CXCR5	LHX1	0.229	-0.51
CTXN3	MIR1908	0.051	-0.559
CXCR5	MIR196B	0.044	-0.526
CXCR5	RAB6C	0.122	-0.516
CTXN3	RAD21L1	0.015	-0.513
CXorf66	SERAC1	0.03	-0.516
CXCR5	SP5	0.185	-0.511
CYP2R1	CYSLTR2	0.232	-0.61
CYSLTR2	DHX34	0.194	-0.557
CYSLTR2	DNTTIP2	0.151	-0.501
CYSLTR2	DSN1	0.239	-0.596
CYSLTR2	EIF5A	0.157	-0.655
CYSLTR2	ELP2P	0.112	-0.729
CYSLTR2	EPO	0.184	-0.567
CYSLTR2	FAM54A	0.105	-0.582
CYSLTR2	FBXL12	0.021	-0.62
CYSLTR2	FBXO48	0.097	-0.627
CYSLTR2	FDXR	0.098	-0.672
CYSLTR2	FLJ39582	0.123	-0.593
CYSLTR2	GORASP1	0.154	-0.565
CYSLTR2	H1FX	0.209	-0.571
CYSLTR2	HACL1	0.188	-0.574
CYSLTR2	HES4	0.076	-0.518
CYSLTR2	HSPA1A	0.198	-0.595
CYSLTR2	IGSF8	0.008	-0.577
CYSLTR2	INCA1	0.215	-0.607
CYSLTR2	JRKL	0.197	-0.732
CYSLTR2	JUNB	0.222	-0.544
CYSLTR2	KDSR	0.224	-0.577
CYSLTR2	KIAA1524	0.169	-0.542
CYSLTR2	KRTCAP2	0.222	-0.598
CYSLTR2	LASS5	0.132	-0.518
CYP2R1	LOC100130000	0.09	-0.505
CYSLTR2	LOC100128822	0.228	-0.554
CYSLTR2	LOC100216545	0.195	-0.579
CYSLTR2	LOC100289511	0.104	-0.689
CYSLTR2	LOC100329108	0.192	-0.575
CYSLTR2	LOC143666	0.227	-0.579
CYSLTR2	LOC154761	0.174	-0.647
CYSLTR2	LOC220930	0.15	-0.655
CYSLTR2	LOC339290	0.152	-0.536
CYSLTR2	LOC400752	0.094	-0.538
CYSLTR2	LOC401397	0.142	-0.546
CYSLTR2	LOC728190	0.177	-0.652
CYSLTR2	LRRC42	0.009	-0.64
CYSLTR2	MANEA	0.093	-0.609
CYSLTR2	MAP3K7	0.197	-0.502
CYSLTR2	MARCH11	0.052	-0.552
CYSLTR2	ME2	0.168	-0.592
CYSLTR2	MIR124-1	0.077	-0.503
CYSLTR2	MIR142	0.186	-0.564
CYBASC3	MIR196B	0.131	-0.502
CYSLTR2	MIR320A	0.014	-0.523
CYSLTR2	MIR484	0.093	-0.559
CYSLTR2	MIR638	0.175	-0.651
CYSLTR2	MKI67IP	0.128	-0.667
CYSLTR2	MTRF1L	0.235	-0.628
CYSLTR2	NCRNA00120	0.229	-0.513
CYSLTR2	NDUFB3	0.221	-0.618
CYSLTR2	NDUFS8	0.193	-0.541
CYSLTR2	NFKB2	0.2	-0.507
CYSLTR2	NPBWR1	0.242	-0.569
CYSLTR2	OBFC1	0.157	-0.616
CYP2R1	OR52A5	0.098	-0.599
CYSLTR2	PEX11A	0.195	-0.642
CYSLTR2	PPP3CC	0.245	-0.657
CYP2R1	PRPS1L1	0.092	-0.547
CYSLTR2	PRR24	0.05	-0.711
CYSLTR2	PSMG1	0.2	-0.682
CYSLTR2	PVRL2	0.127	-0.561
CYSLTR2	RAB2B	0.13	-0.565
CYSLTR2	RG9MTD2	0.225	-0.532
CYSLTR2	ROCK1	0.233	-0.627
CYP2R1	SCARNA23	0.154	-0.505
CYSLTR2	SCYL2	0.229	-0.561
CYSLTR2	SEH1L	0.231	-0.636
CYSLTR2	SEPT11	0.054	-0.746
CYSLTR2	SERAC1	0.052	-0.591
CYP2R1	SNORA40	0.103	-0.603
CYSLTR2	SNORD12C	0.065	-0.598
CYSLTR2	SNORD74	0.242	-0.568
CYP2R1	SNORD88B	0.199	-0.545
CYP2R1	SUMO4	0.082	-0.544
CYSLTR2	SUPT5H	0.059	-0.543
CYSLTR2	SVIP	0.147	-0.68
CYSLTR2	TADA2A	0.204	-0.585
CYP2R1	TIGD7	0.164	-0.525
CYSLTR2	TMEM141	0.147	-0.562
CYSLTR2	TMEM194A	0.217	-0.556
CYSLTR2	TOP3B	0.13	-0.514
CYSLTR2	TOX4	0.071	-0.571
CYSLTR2	TTC21A	0.135	-0.558
CYSLTR2	UTP3	0.151	-0.515
CYSLTR2	WASH5P	0.211	-0.543
CYSLTR2	WDR93	0.244	-0.502
CYSLTR2	WDYHV1	0.199	-0.564
CYSLTR2	ZNF480	0.214	-0.582
CYSLTR2	ZNF554	0.184	-0.645
CYSLTR2	ZNF768	0.247	-0.712
CYSLTR2	ZNF780B	0.111	-0.617
DAZL	FAM72B	0.014	-0.54
DCAF8L2	GGNBP2	0.008	-0.502
DCDC2B	HMX3	0.172	-0.507
DBX1	KIF3B	0.064	-0.509
DBX1	LILRB4	0.026	-0.545
DBX1	MDFIC	0.058	-0.501
DCDC1	OR52A5	0.096	-0.542
DCDC1	PRPS1L1	0.165	-0.52
DBX1	PTCRA	0.001	-0.527
DBX1	SLC6A16	0.061	-0.508
DCDC1	SNORA40	0.063	-0.551
DEFB108B	FDXR	0.148	-0.514
DEFB108B	JRKL	0.167	-0.584
DDX4	LOC100329108	0.05	-0.514
DEFB108B	LOC100289511	0.124	-0.566
DEFB108B	MIR638	0.031	-0.502
DEFB108B	MKI67IP	0.063	-0.51
DEFB108B	NCRNA00115	0.018	-0.614
DEFB108B	PCBD2	0.17	-0.507
DEFB108B	PEX11A	0.138	-0.52
DEFB108B	PPP3CC	0.102	-0.525
DEFB108B	PRR24	-0.0	-0.555
DEFB108B	PSMG1	0.125	-0.542
DEFB108B	RRP8	0.065	-0.646
DEFB108B	SVIP	0.092	-0.539
DEFB108B	ZNF554	0.024	-0.516
DEFB108B	ZNF768	0.046	-0.562
DHX34	DISC2	0.082	-0.512
DEPDC4	MIR548K	0.141	-0.527
DHX34	MIR548K	0.164	-0.543
DEPDC4	SNORA2B	0.086	-0.526
DHX34	SNORA2B	0.026	-0.522
DHX34	SNORA40	0.138	-0.558
DHX34	TIGD7	0.169	-0.564
DISC2	EIF4ENIF1	0.238	-0.59
DISC2	EIF5A	0.066	-0.63
DISC2	ELP2P	0.059	-0.653
DLX2	FAM12A	0.116	-0.521
DLX2	FAM92A3	0.018	-0.525
DISC2	FDXR	0.053	-0.613
DISC2	FLJ39582	0.049	-0.529
DISC2	GCSH	0.135	-0.533
DKFZP586I1420	GGNBP2	0.028	-0.554
DISC2	GORASP1	0.097	-0.541
DISC2	HSPA1A	0.044	-0.542
DLX2	HSFYP1	0.085	-0.537
DLX6	IL17A	0.035	-0.502
DISC2	JRKL	0.125	-0.615
DISC2	KIAA1524	0.073	-0.514
DISC2	KRTCAP2	0.178	-0.537
DMRTA2	LILRB4	0.075	-0.521
DISC2	LOC100128822	0.102	-0.562
DISC2	LOC100216545	0.091	-0.548
DISC2	LOC100289511	0.106	-0.52
DISC2	LOC100329108	0.01	-0.608
DISC2	LOC143666	0.089	-0.571
DISC2	LOC154761	0.079	-0.574
DISC2	LOC220930	0.09	-0.6
DISC2	LOC284900	0.01	-0.532
DISC2	ME2	0.066	-0.55
DISC2	MIR484	0.029	-0.525
DLX2	MIR549	0.037	-0.537
DISC2	MIR636	0.032	-0.51
DISC2	MIR638	0.066	-0.536
DMRTA2	MIR634	0.009	-0.523
DISC2	MKI67IP	0.023	-0.596
DLX2	MIR941-1	0.237	-0.544
DISC2	MTRF1L	0.122	-0.532
DISC2	NCRNA00115	0.03	-0.615
DISC2	NDUFB3	0.114	-0.587
DISC2	NDUFS3	0.244	-0.534
DISC2	NQO2	0.204	-0.517
DISC2	OBFC1	0.116	-0.53
DLX1	PECAM1	0.081	-0.562
DLX2	PECAM1	0.184	-0.528
DISC2	PEX11A	0.098	-0.586
DISC2	PPP3CC	0.109	-0.577
DISC2	PSMG1	0.135	-0.567
DISC2	PVRL2	0.057	-0.574
DISC2	RPGRIP1L	0.157	-0.587
DISC2	RRP8	0.097	-0.646
DISC2	SEH1L	0.045	-0.589
DISC2	SEPT11	0.052	-0.573
DISC2	SLC35F5	0.129	-0.52
DLX2	SLC6A16	0.195	-0.536
DLEU1	SNORA40	0.109	-0.526
DLX2	SNORD113-4	0.072	-0.525
DISC2	SVIP	0.09	-0.639
DLX2	TIGIT	0.053	-0.508
DISC2	TMBIM6	0.155	-0.548
DISC2	TMEM141	0.043	-0.562
DISC2	TOP3B	0.138	-0.523
DISC2	TTC21A	0.043	-0.538
DISC2	WDYHV1	0.133	-0.523
DISC2	ZFC3H1	0.145	-0.503
DISC2	ZNF480	0.137	-0.564
DISC2	ZNF768	0.173	-0.58
DNASE1L3	HMX3	0.225	-0.518
DNPEP	MIR548K	0.035	-0.567
DNPEP	MIR573	0.066	-0.516
DNPEP	OR52H1	0.154	-0.521
DNPEP	SNORA19	0.04	-0.524
DNPEP	SNORA2B	0.058	-0.549
DNAJB9	SNORA40	0.187	-0.517
DNTTIP2	SNORA40	0.069	-0.529
DPPA2	LOC100329108	0.027	-0.532
DSN1	MIR1296	0.028	-0.562
DSN1	MIR548K	0.188	-0.52
DSN1	OR13F1	0.151	-0.551
DPY30	OR52A5	0.037	-0.518
DSN1	OR52A5	0.107	-0.571
DSN1	PRPS1L1	0.134	-0.526
DSN1	SNORA2B	0.238	-0.544
DPY30	SNORA40	0.089	-0.588
DSN1	SNORA40	0.138	-0.544
DPPA2	SNORD12C	0.026	-0.513
DSN1	STH	0.231	-0.502
DUSP28	ELP2P	0.212	-0.506
DSPP	FAM59A	0.014	-0.522
DUSP28	FXYD5	0.04	-0.527
DUSP28	HSPB11	0.139	-0.555
DUSP28	LOC100329108	0.185	-0.522
DUSP28	MARCH11	0.025	-0.525
DSPP	MIR1908	0.011	-0.501
DTD1	OR52A5	0.045	-0.545
DUSP28	REL	0.21	-0.507
DUSP28	SEPT11	0.048	-0.508
DUSP28	SERAC1	0.056	-0.502
DTD1	SNORA40	0.065	-0.532
DTD1	TIGD7	0.082	-0.507
EFCAB9	FAM72B	0.108	-0.533
EFCAB9	FXYD5	0.029	-0.524
EFCAB9	HSPB11	0.036	-0.522
EFCAB9	LOC100329108	0.048	-0.523
EFCAB9	LOC154761	0.069	-0.512
EIF3A	ELP2P	0.15	-0.505
EIF4ENIF1	FAM10A4	0.137	-0.532
EIF4ENIF1	FAM151A	0.231	-0.553
EIF4ENIF1	FAM183B	0.237	-0.501
EIF5A	FAM151A	0.195	-0.604
EIF5A	FAM183B	0.176	-0.536
EIF3A	FAM72B	0.195	-0.538
ELF2	FAM72B	0.199	-0.538
[truncated: 194,312 more rows]
